# Supplementary material for: Heterogeneity of Synchronous Lung Metastasis Calls for Risk Stratification and Prognostic Classification: Evidence from a Population-Based Database
Source: MDPI journal article supplement (doi:10.3390/cancers14071608), 2022-03-22
Supplement: s1 [file s1]

**Supplementary Table S1.** Number of cases with synchronous lung metastasis and all cases, prevalence of synchronous lung metastasis and median survival with interquartile range by cancer type and race or sex.

| Categories                 | Race      | No. of sLM (All) | Prevalence <sup>a</sup>               | Survival <sup>b</sup>    | Sex    | No. of sLM (All) | Prevalence <sup>a</sup>              | Survival <sup>b</sup>   |
|----------------------------|-----------|------------------|---------------------------------------|--------------------------|--------|------------------|--------------------------------------|-------------------------|
| Brain                      | Caucasian | 14 (23,690)      | 0.06% (0.03%-0.09%) <sup>ns</sup>     | 10 (3-23) <sup>*</sup>   | Female | 8 (11,946)       | 0.07% (0.02%-0.11%) <sup>ns</sup>    | 3 (2-10) <sup>*</sup>   |
|                            | AA        | 1 (1,810)        | NA                                    | NA (NA-NA)               | Male   | 9 (15,539)       | 0.06% (0.02%-0.10%)                  | 18 (9-32)               |
|                            | Other     | 2 (1,789)        | NA                                    | 2 (1-3)                  |        |                  |                                      |                         |
|                            | Unknown   | 0 (196)          | NA                                    | NA                       |        |                  |                                      |                         |
| Head and neck              | Caucasian | 1,168 (61,067)   | 1.91% (1.80%-2.02%) <sup>***</sup>    | 8 (3-20) <sup>***</sup>  | Female | 354 (19,683)     | 1.80% (1.61%-1.98%) <sup>***</sup>   | 9 (3-24) <sup>ns</sup>  |
|                            | AA        | 264 (7,628)      | 3.46% (3.05%-3.87%)                   | 7 (3-17)                 | Male   | 1,220 (55,214)   | 2.21% (2.09%-2.33%)                  | 8 (3-20)                |
|                            | Other     | 138 (5,392)      | 2.56% (2.14%-2.98%)                   | 13 (5-32)                |        |                  |                                      |                         |
|                            | Unknown   | 4 (810)          | NA                                    | 16.5 (10.5-24)           |        |                  |                                      |                         |
| Thyroid                    | Caucasian | 748 (62,161)     | 1.20% (1.12%-1.29%) <sup>***</sup>    | 10 (2-79) <sup>ns</sup>  | Female | 529 (59,891)     | 0.88% (0.81%-0.96%) <sup>***</sup>   | 9 (2-NA) <sup>ns</sup>  |
|                            | AA        | 93 (5,546)       | 1.68% (1.34%-2.01%)                   | 14 (1-NA)                | Male   | 467 (18,112)     | 2.58% (2.35%-2.81%)                  | 11 (2-79)               |
|                            | Other     | 150 (8,989)      | 1.67% (1.40%-1.93%)                   | 13 (2-NA)                |        |                  |                                      |                         |
|                            | Unknown   | 5 (1,307)        | 0.38% (0.05%-0.72%)                   | 10 (5-NA)                |        |                  |                                      |                         |
| Breast                     | Caucasian | 4,261 (280,603)  | 1.52% (1.47%-1.56%) <sup>***</sup>    | 20 (5-49) <sup>***</sup> | Female | 5,886 (356,039)  | 1.65% (1.61%-1.70%) <sup>***</sup>   | 20 (5-47) <sup>ns</sup> |
|                            | AA        | 1,155 (40,698)   | 2.84% (2.68%-3.00%)                   | 15 (4-39)                | Male   | 86 (2,610)       | 3.30% (2.61%-3.98%)                  | 24 (5-64)               |
|                            | Other     | 527 (34,338)     | 1.53% (1.40%-1.66%)                   | 27 (8-53)                |        |                  |                                      |                         |
|                            | Unknown   | 29 (3,010)       | 0.96% (0.61%-1.31%)                   | 53 (53-NA)               |        |                  |                                      |                         |
| Main bronchus              | Caucasian | 1,444 (8,875)    | 16.27% (15.50%-17.04%) <sup>***</sup> | 3 (1-10) <sup>ns</sup>   | Female | 852 (4,881)      | 17.46% (16.39%-18.52%) <sup>ns</sup> | 4 (1-11) <sup>***</sup> |
|                            | AA        | 262 (1,394)      | 18.79% (16.74%-20.85%)                | 4 (1-12)                 | Male   | 1,001 (5,997)    | 16.69% (15.75%-17.64%)               | 3 (1-9)                 |
|                            | Other     | 145 (587)        | 24.70% (21.21%-28.19%)                | 5 (1-13)                 |        |                  |                                      |                         |
|                            | Unknown   | 2 (22)           | NA                                    | 3 (3-3)                  |        |                  |                                      |                         |
| Oesophagus                 | Caucasian | 1,589 (16,847)   | 9.43% (8.99%-9.87%) <sup>***</sup>    | 4 (1-10) <sup>ns</sup>   | Female | 365 (4,101)      | 8.90% (8.03%-9.77%) <sup>*</sup>     | 4 (1-10) <sup>ns</sup>  |
|                            | AA        | 271 (2,007)      | 13.50% (12.01%-15.00%)                | 3 (1-7)                  | Male   | 1,611 (15,967)   | 10.09% (9.62%-10.56%)                | 4 (1-9)                 |
|                            | Other     | 112 (1,133)      | 9.89% (8.15%-11.62%)                  | 5 (2-11)                 |        |                  |                                      |                         |
|                            | Unknown   | 4 (81)           | NA                                    | 6.5 (1.5-10.5)           |        |                  |                                      |                         |
| Stomach                    | Caucasian | 1,293 (22,378)   | 5.78% (5.47%-6.08%) <sup>***</sup>    | 4 (1-9) <sup>ns</sup>    | Female | 568 (12,065)     | 4.71% (4.33%-5.09%) <sup>***</sup>   | 3 (1-8) <sup>ns</sup>   |
|                            | AA        | 220 (4,149)      | 5.30% (4.62%-5.98%)                   | 2 (1-8)                  | Male   | 1,188 (19,760)   | 6.01% (5.68%-6.34%)                  | 3 (1-10)                |
|                            | Other     | 235 (5,047)      | 4.66% (4.07%-5.24%)                   | 3 (1-9)                  |        |                  |                                      |                         |
|                            | Unknown   | 8 (251)          | 3.19% (1.01%-5.36%)                   | 4 (1-NA)                 |        |                  |                                      |                         |
| Liver <sup>c</sup>         | Caucasian | 1,556 (18,396)   | 8.46% (8.06%-8.86%) <sup>ns</sup>     | 2 (1-7) <sup>ns</sup>    | Female | 652 (7,596)      | 8.58% (7.95%-9.21%) <sup>ns</sup>    | 3 (1-8) <sup>***</sup>  |
|                            | AA        | 303 (3,477)      | 8.71% (7.78%-9.65%)                   | 2 (0-5)                  | Male   | 1,593 (18,671)   | 8.53% (8.13%-8.93%)                  | 2 (1-5)                 |
|                            | Other     | 377 (4,258)      | 8.85% (8.00%-9.71%)                   | 3 (1-6)                  |        |                  |                                      |                         |
|                            | Unknown   | 9 (136)          | 6.62% (2.44%-10.80%)                  | 4 (2-7)                  |        |                  |                                      |                         |
| Extrahepatic biliary tract | Caucasian | 656 (10,733)     | 6.11% (5.66%-6.57%) <sup>ns</sup>     | 3 (1-8) <sup>ns</sup>    | Female | 478 (7,828)      | 6.11% (5.58%-6.64%) <sup>ns</sup>    | 3 (1-9) <sup>ns</sup>   |
|                            | AA        | 102 (1,568)      | 6.51% (5.28%-7.73%)                   | 3 (1-7)                  | Male   | 398 (6,410)      | 6.21% (5.62%-6.80%)                  | 3 (1-7)                 |
|                            | Other     | 114 (1,874)      | 6.08% (5.00%-7.17%)                   | 4 (1-10)                 |        |                  |                                      |                         |
|                            | Unknown   | 4 (63)           | NA                                    | 2 (2-5)                  |        |                  |                                      |                         |
| Pancreas                   | Caucasian | 4,469 (41,197)   | 10.85% (10.55%-11.15%) <sup>ns</sup>  | 3 (1-8) <sup>ns</sup>    | Female | 2,777 (25,288)   | 10.98% (10.60%-11.37%) <sup>ns</sup> | 3 (1-8) <sup>***</sup>  |
|                            | AA        | 697 (6,623)      | 10.52% (9.78%-11.26%)                 | 2 (1-7)                  | Male   | 2,905 (27,154)   | 10.70% (10.33%-11.07%)               | 2 (1-7)                 |
|                            | Other     | 504 (4,449)      | 11.33% (10.40%-12.26%)                | 2 (1-7)                  |        |                  |                                      |                         |
|                            | Unknown   | 12 (173)         | 6.94% (3.15%-10.72%)                  | 2 (1-6)                  |        |                  |                                      |                         |
| Small intestine            | Caucasian | 169 (7,325)      | 2.31% (1.96%-2.65%) <sup>ns</sup>     | 8 (2-22) <sup>ns</sup>   | Female | 127 (4,708)      | 2.70% (2.23%-3.16%) <sup>ns</sup>    | 8 (2-27) <sup>ns</sup>  |
|                            | AA        | 56 (1,753)       | 3.19% (2.37%-4.02%)                   | 7 (2-14)                 | Male   | 112 (4,920)      | 2.28% (1.86%-2.69%)                  | 8 (1-17)                |
|                            | Other     | 13 (438)         | 2.97% (1.38%-4.56%)                   | 8 (1-35)                 |        |                  |                                      |                         |
|                            | Unknown   | 1 (112)          | NA                                    | NA (NA-NA)               |        |                  |                                      |                         |
| Colon & rectum             | Caucasian | 7,055 (142,974)  | 4.93% (4.82%-5.05%) <sup>***</sup>    | 12 (3-26) <sup>***</sup> | Female | 4,358 (88,810)   | 4.91% (4.77%-5.05%) <sup>***</sup>   | 11 (3-26) <sup>ns</sup> |
|                            | AA        | 1,569 (23,428)   | 6.70% (6.38%-7.02%)                   | 10 (3-22)                | Male   | 5,287 (97,729)   | 5.41% (5.27%-5.55%)                  | 12 (3-25)               |
|                            | Other     | 999 (18,370)     | 5.44% (5.11%-5.77%)                   | 11 (3-25)                |        |                  |                                      |                         |
|                            | Unknown   | 22 (1,767)       | 1.25% (0.73%-1.76%)                   | 12 (6-23)                |        |                  |                                      |                         |
| Anus                       | Caucasian | 147 (7,948)      | 1.85% (1.55%-2.15%) <sup>***</sup>    | 11 (5-23) <sup>ns</sup>  | Female | 103 (5,991)      | 1.72% (1.39%-2.05%) <sup>*</sup>     | 13 (5-22) <sup>ns</sup> |
|                            | AA        | 20 (1,091)       | 1.83% (1.04%-2.63%)                   | 10 (6-28)                | Male   | 80 (3,414)       | 2.34% (1.84%-2.85%)                  | 11 (5-28)               |
|                            | Other     | 14 (289)         | 4.84% (2.37%-7.32%)                   | 6 (4-16)                 |        |                  |                                      |                         |
|                            | Unknown   | 2 (77)           | NA                                    | 13 (13-13)               |        |                  |                                      |                         |
| Other GI                   | Caucasian | 512 (6,949)      | 7.37% (6.75%-7.98%) <sup>***</sup>    | 2 (0-7) <sup>ns</sup>    | Female | 297 (4,632)      | 6.41% (5.71%-7.12%) <sup>***</sup>   | 2 (0-6) <sup>ns</sup>   |
|                            | AA        | 89 (920)         | 9.67% (7.76%-11.58%)                  | 2 (0-6)                  | Male   | 383 (3,979)      | 9.63% (8.71%-10.54%)                 | 2 (0-7)                 |
|                            | Other     | 78 (645)         | 12.09% (9.58%-14.61%)                 | 2 (1-5)                  |        |                  |                                      |                         |
|                            | Unknown   | 1 (97)           | NA                                    | NA (NA-NA)               |        |                  |                                      |                         |
| Kidney                     | Caucasian | 4,773 (56,080)   | 8.51% (8.28%-8.74%) <sup>***</sup>    | 8 (2-22) <sup>***</sup>  | Female | 1,727 (25,340)   | 6.82% (6.51%-7.13%) <sup>***</sup>   | 7 (2-19) <sup>***</sup> |
|                            | AA        | 552 (8,225)      | 6.71% (6.17%-7.25%)                   | 5 (2-13)                 | Male   | 4,096 (44,265)   | 9.25% (8.98%-9.52%)                  | 8 (3-23)                |
|                            | Other     | 482 (4,618)      | 10.44% (9.56%-11.32%)                 | 9 (3-26)                 |        |                  |                                      |                         |
|                            | Unknown   | 16 (682)         | 2.35% (1.21%-3.48%)                   | NA (4-NA)                |        |                  |                                      |                         |
| Bladder                    | Caucasian | 1,019 (36,085)   | 2.82% (2.65%-2.99%) <sup>***</sup>    | 4 (1-11) <sup>ns</sup>   | Female | 372 (10,341)     | 3.60% (3.24%-3.96%) <sup>***</sup>   | 3 (1-9) <sup>ns</sup>   |
|                            | AA        | 139 (2,953)      | 4.71% (3.94%-5.47%)                   | 4 (1-9)                  | Male   | 843 (31,327)     | 2.69% (2.51%-2.87%)                  | 4 (1-11)                |
|                            | Other     | 56 (2,231)       | 2.51% (1.86%-3.16%)                   | 7 (2-17)                 |        |                  |                                      |                         |
|                            | Unknown   | 1 (399)          | NA                                    | NA (NA-NA)               |        |                  |                                      |                         |
| Prostate                   | Caucasian | 949 (233,486)    | 0.41% (0.38%-0.43%) <sup>***</sup>    | 21 (8-63) <sup>ns</sup>  | Male   | 1,339 (309,918)  | 0.43% (0.41%-0.46%)                  | 22 (8-63)               |
|                            | AA        | 288 (49,941)     | 0.58% (0.51%-0.64%)                   | 23 (9-65)                |        |                  |                                      |                         |
|                            | Other     | 96 (16,121)      | 0.60% (0.48%-0.71%)                   | 19 (9-58)                |        |                  |                                      |                         |
|                            | Unknown   | 6 (10,370)       | 0.06% (0.01%-0.10%)                   | 43 (26-NA)               |        |                  |                                      |                         |
| Testis                     | Caucasian | 1,016 (14,094)   | 7.21% (6.78%-7.64%) <sup>***</sup>    | NA (20-NA) <sup>ns</sup> | Male   | 1,129 (15,881)   | 7.11% (6.71%-7.51%)                  | NA (20-NA)              |
|                            | AA        | 42 (471)         | 8.92% (6.34%-11.49%)                  | NA (NA-NA)               |        |                  |                                      |                         |
|                            | Other     | 68 (900)         | 7.56% (5.83%-9.28%)                   | NA (12-NA)               |        |                  |                                      |                         |

|                   |           |                |                                      |                          |        |                |                                   |                         |
|-------------------|-----------|----------------|--------------------------------------|--------------------------|--------|----------------|-----------------------------------|-------------------------|
| Other GU          | Unknown   | 3 (416)        | NA                                   | NA (NA-NA)               |        |                |                                   |                         |
|                   | Caucasian | 422 (7,226)    | 5.84% (5.30%-6.38%) *                | 5 (2-12) <sup>ns</sup>   | Female | 215 (2,736)    | 7.86% (6.85%-8.87%) ***           | 5 (2-11) <sup>ns</sup>  |
|                   | AA        | 54 (696)       | 7.76% (5.77%-9.75%)                  | 4 (1-9)                  | Male   | 314 (5,982)    | 5.25% (4.68%-5.81%)               | 6 (2-13)                |
| Ovary             | Other     | 52 (711)       | 7.31% (5.40%-9.23%)                  | 4 (2-15)                 |        |                |                                   |                         |
|                   | Unknown   | 1 (85)         | NA                                   | 10 (10-10)               |        |                |                                   |                         |
|                   | Caucasian | 1,346 (24,094) | 5.59% (5.30%-5.88%) ***              | 16 (3-35) ***            | Female | 1,696 (29,789) | 5.69% (5.43%-5.96%)               | 16 (2-36)               |
|                   | AA        | 205 (2,604)    | 7.87% (6.84%-8.91%)                  | 8 (2-28)                 |        |                |                                   |                         |
|                   | Other     | 141 (2,916)    | 4.84% (4.06%-5.61%)                  | 19 (4-46)                |        |                |                                   |                         |
|                   | Unknown   | 4 (175)        | NA                                   | NA (NA-NA)               |        |                |                                   |                         |
| Uterus            | Caucasian | 905 (58,908)   | 1.54% (1.44%-1.64%) ***              | 8 (2-23) <sup>ns</sup>   | Female | 1,232 (73,342) | 1.68% (1.59%-1.77%)               | 8 (2-22)                |
|                   | AA        | 206 (6,850)    | 3.01% (2.60%-3.41%)                  | 8 (2-16)                 |        |                |                                   |                         |
|                   | Other     | 117 (6,874)    | 1.70% (1.40%-2.01%)                  | 9 (3-29)                 |        |                |                                   |                         |
| Cervix            | Unknown   | 4 (710)        | NA                                   | 30.5 (5-NA)              |        |                |                                   |                         |
|                   | Caucasian | 620 (15,415)   | 4.02% (3.71%-4.33%) ***              | 7 (2-18) <sup>ns</sup>   | Female | 844 (20,658)   | 4.09% (3.82%-4.36%)               | 7 (3-17)                |
|                   | AA        | 136 (2,782)    | 4.89% (4.09%-5.69%)                  | 6 (3-13)                 |        |                |                                   |                         |
| Other GYN         | Other     | 88 (2,226)     | 3.95% (3.14%-4.76%)                  | 7 (4-25)                 |        |                |                                   |                         |
|                   | Unknown   | 0 (235)        | NA                                   | NA                       |        |                |                                   |                         |
|                   | Caucasian | 366 (8,733)    | 4.19% (3.77%-4.61%) *                | 5 (1-23) *               | Female | 457 (10,514)   | 4.35% (3.96%-4.74%)               | 5 (1-23)                |
| Bone tumor        | AA        | 52 (1,014)     | 5.13% (3.77%-6.49%)                  | 2 (1-8)                  |        |                |                                   |                         |
|                   | Other     | 38 (646)       | 5.88% (4.07%-7.70%)                  | 8 (3-43)                 |        |                |                                   |                         |
|                   | Unknown   | 1 (121)        | NA                                   | 1 (1-1)                  |        |                |                                   |                         |
| STS               | Caucasian | 503 (4,155)    | 12.11% (11.11%-13.10%) <sup>ns</sup> | 20 (8-NA) <sup>ns</sup>  | Female | 221 (2,205)    | 10.02% (8.77%-11.28%) ***         | 18 (8-NA) <sup>ns</sup> |
|                   | AA        | 57 (456)       | 12.50% (9.46%-15.54%)                | 13 (6-37)                | Male   | 388 (2,874)    | 13.50% (12.25%-14.75%)            | 19 (8-59)               |
|                   | Other     | 45 (429)       | 10.49% (7.59%-13.39%)                | 18 (9-37)                |        |                |                                   |                         |
| Skin melanoma     | Unknown   | 4 (39)         | NA                                   | 21 (14-NA)               |        |                |                                   |                         |
|                   | Caucasian | 1,574 (19,041) | 8.27% (7.88%-8.66%) ***              | 8 (2-24) <sup>ns</sup>   | Female | 1,199 (12,286) | 9.76% (9.23%-10.28%) ***          | 9 (2-23) <sup>ns</sup>  |
|                   | AA        | 395 (3,328)    | 11.87% (10.77%-12.97%)               | 8 (3-21)                 | Male   | 982 (12,807)   | 7.67% (7.21%-8.13%)               | 8 (2-22)                |
|                   | Other     | 203 (2,234)    | 9.09% (7.89%-10.28%)                 | 9 (2-23)                 |        |                |                                   |                         |
|                   | Unknown   | 9 (490)        | 1.84% (0.65%-3.03%)                  | 5 (3-NA)                 |        |                |                                   |                         |
|                   | Caucasian | 1,017 (99,591) | 1.02% (0.96%-1.08%) ***              | 6 (2-20) <sup>ns</sup>   | Female | 302 (46,781)   | 0.65% (0.57%-0.72%) ***           | 6 (2-20) <sup>ns</sup>  |
|                   | AA        | 18 (454)       | 3.96% (2.17%-5.76%)                  | 6 (3-13)                 | Male   | 763 (60,506)   | 1.26% (1.17%-1.35%)               | 6 (2-20)                |
|                   | Other     | 27 (910)       | 2.97% (1.86%-4.07%)                  | 5 (3-12)                 |        |                |                                   |                         |
| Non-skin melanoma | Unknown   | 3 (6,332)      | NA                                   | NA (NA-NA)               |        |                |                                   |                         |
|                   | Caucasian | 93 (2,793)     | 3.33% (2.66%-4.00%) <sup>ns</sup>    | 6 (3-14) <sup>ns</sup>   | Female | 61 (1,689)     | 3.61% (2.72%-4.50%) <sup>ns</sup> | 5 (3-14) <sup>ns</sup>  |
|                   | AA        | 3 (97)         | NA                                   | 3 (0-4)                  | Male   | 45 (1,395)     | 3.23% (2.30%-4.15%)               | 6 (3-14)                |
| Skin cancer       | Other     | 10 (154)       | 6.49% (2.60%-10.39%)                 | 6 (5-14)                 |        |                |                                   |                         |
|                   | Unknown   | 0 (40)         | NA                                   | NA                       |        |                |                                   |                         |
|                   | Caucasian | 30 (4,661)     | 0.64% (0.41%-0.87%) <sup>ns</sup>    | 9 (6-20) <sup>ns</sup>   | Female | 13 (2,253)     | 0.58% (0.26%-0.89%) <sup>ns</sup> | 17 (8-34) <sup>ns</sup> |
|                   | AA        | 1 (207)        | NA                                   | 17 (17-17)               | Male   | 24 (3,092)     | 0.78% (0.47%-1.09%)               | 9 (5.5-18)              |
|                   | Other     | 3 (242)        | NA                                   | 8 (7-10)                 |        |                |                                   |                         |
| Embryonal tumors  | Unknown   | 3 (235)        | NA                                   | 33.5 (4-NA)              |        |                |                                   |                         |
|                   | Caucasian | 245 (3,229)    | 7.59% (6.67%-8.50%) <sup>ns</sup>    | NA (19-NA) <sup>ns</sup> | Female | 168 (1,999)    | 8.40% (7.19%-9.62%) <sup>ns</sup> | NA (NA-NA) ***          |
|                   | AA        | 55 (575)       | 9.57% (7.16%-11.97%)                 | NA (NA-NA)               | Male   | 166 (2,282)    | 7.27% (6.21%-8.34%)               | NA (12-NA)              |
| All other         | Other     | 30 (419)       | 7.16% (4.69%-9.63%)                  | NA (23-NA)               |        |                |                                   |                         |
|                   | Unknown   | 4 (58)         | NA                                   | NA (30-NA)               |        |                |                                   |                         |
|                   | Caucasian | 2,229 (24,926) | 8.94% (8.59%-9.30%) *                | 4 (1-18) ***             | Female | 1,781 (20,228) | 8.80% (8.41%-9.20%) <sup>ns</sup> | 6 (1-24) ***            |
|                   | AA        | 382 (4,696)    | 8.13% (7.35%-8.92%)                  | 5 (1-24)                 | Male   | 1,122 (12,840) | 8.74% (8.25%-9.23%)               | 4 (1-15)                |
|                   | Other     | 274 (3,070)    | 8.93% (7.92%-9.93%)                  | 8 (1-43)                 |        |                |                                   |                         |
|                   | Unknown   | 18 (376)       | 4.79% (2.63%-6.95%)                  | 2 (0-15)                 |        |                |                                   |                         |

\* Prevalence was only calculated in category with more than 5 sLM cases.

<sup>b</sup> Survival data (in months) are shown as the median survival and interquartile range in cases with synchronous lung metastasis at diagnosis.

<sup>c</sup> Liver cancer here includes hepatocellular carcinoma and intrahepatic cholangiocarcinoma.

Abbreviations: sLM: synchronous lung metastasis; AA: African American; GI: gastrointestinal cancer; GU: genitourinary cancer; GYN: gynecologic cancer; STS: soft-tissue sarcoma; NA: non-applicable; ns: non-significant; \*: p<0.05; \*\*\*: p<0.001 for intragroup survival comparison by Chi-square tests or log-rank tests.

**Supplementary Table S2.** Number of cases with synchronous lung metastasis and all cases, prevalence of synchronous lung metastasis and median survival with interquartile range by cancer type and age or county-level income.

| Categories                 | Age     | No. of sLM (All) | Prevalence <sup>a</sup>              | Survival <sup>b</sup>     | Income <sup>c</sup> | No. of sLM (All) | Prevalence <sup>a</sup>               | Survival <sup>b</sup>    |
|----------------------------|---------|------------------|--------------------------------------|---------------------------|---------------------|------------------|---------------------------------------|--------------------------|
| Brain                      | 0 - 18  | 1 (2,577)        | NA <sup>ns</sup>                     | NA (NA-NA) <sup>ns</sup>  | 1 <sup>st</sup>     | 1 (1,120)        | NA <sup>ns</sup>                      | 18 (18-18) <sup>ns</sup> |
|                            | 19 - 40 | 3 (4,280)        | NA                                   | 16 (9-NA)                 | 2 <sup>nd</sup>     | 1 (2,363)        | NA                                    | 7 (7-7)                  |
|                            | 41 - 60 | 4 (9,379)        | NA                                   | 15 (5-26)                 | 3 <sup>rd</sup>     | 1 (3,785)        | NA                                    | NA (NA-NA)               |
|                            | 61 - 80 | 8 (10,015)       | 0.08% (0.02%-0.14%)                  | 2.5 (1.5-14.5)            | 4 <sup>th</sup>     | 14 (20,193)      | 0.07% (0.03%-0.11%)                   | 6.5 (2-23)               |
|                            | 80+     | 1 (1,234)        | NA                                   | 4 (4-4)                   | Unk                 | 0 (24)           | NA                                    | NA                       |
| Head and neck              | 0 - 18  | 4 (249)          | NA <sup>***</sup>                    | 34 (34-34) <sup>***</sup> | 1 <sup>st</sup>     | 118 (4,595)      | 2.57% (2.11%-3.03%) <sup>***</sup>    | 6 (2-12) <sup>***</sup>  |
|                            | 19 - 40 | 47 (3,089)       | 1.52% (1.09%-1.95%)                  | 22 (11-32)                | 2 <sup>nd</sup>     | 222 (8,884)      | 2.50% (2.17%-2.82%)                   | 7 (3-14)                 |
|                            | 41 - 60 | 598 (31,177)     | 1.92% (1.77%-2.07%)                  | 9 (4-24)                  | 3 <sup>rd</sup>     | 235 (11,026)     | 2.13% (1.86%-2.40%)                   | 7 (2-19)                 |
|                            | 61 - 80 | 803 (34,246)     | 2.34% (2.18%-2.51%)                  | 8 (3-18)                  | 4 <sup>th</sup>     | 995 (50,272)     | 1.98% (1.86%-2.10%)                   | 10 (4-24)                |
|                            | 80+     | 122 (6,136)      | 1.99% (1.64%-2.34%)                  | 5 (1-13)                  | Unk                 | 4 (120)          | NA                                    | 7 (4.5-15.5)             |
| Thyroid                    | 0 - 18  |                  |                                      | NA (NA-NA)                | 1 <sup>st</sup>     |                  |                                       |                          |
|                            | 19 - 40 | 24 (1,308)       | 1.83% (1.11%-2.56%) <sup>***</sup>   | ***                       | 2 <sup>nd</sup>     | 34 (2,885)       | 1.18% (0.78%-1.57%) <sup>ns</sup>     | 12 (2-35) <sup>ns</sup>  |
|                            | 41 - 60 | 78 (22,756)      | 0.34% (0.27%-0.42%)                  | NA (NA-NA)                | 3 <sup>rd</sup>     | 85 (6,207)       | 1.37% (1.08%-1.66%)                   | 16 (3-79)                |
|                            | 61 - 80 | 242 (35,383)     | 0.68% (0.60%-0.77%)                  | 14 (3-76)                 | 4 <sup>th</sup>     | 124 (9,795)      | 1.27% (1.04%-1.49%)                   | 11 (1-NA)                |
|                            | 80+     | 522 (17,035)     | 3.06% (2.81%-3.32%)                  | 9 (2-59)                  | Unk                 | 753 (59,019)     | 1.28% (1.19%-1.37%)                   | 11 (2-83)                |
| Breast                     | 0 - 18  | 130 (1,521)      | 8.55% (7.14%-9.95%)                  | 2 (0-14)                  | 1 <sup>st</sup>     | 0 (97)           | NA                                    | NA                       |
|                            | 19 - 40 | 0 (8)            | NA <sup>***</sup>                    | NA <sup>***</sup>         | 2 <sup>nd</sup>     | 323 (15,489)     | 2.09% (1.86%-2.31%) <sup>***</sup>    | 15 (4-37) <sup>***</sup> |
|                            | 41 - 60 | 384 (22,835)     | 1.68% (1.51%-1.85%)                  | 30 (13-58)                | 3 <sup>rd</sup>     | 666 (31,952)     | 2.08% (1.93%-2.24%)                   | 17 (4-41)                |
|                            | 61 - 80 | 2,228 (154,724)  | 1.44% (1.38%-1.50%)                  | 24 (7-50)                 | 4 <sup>th</sup>     | 710 (46,654)     | 1.52% (1.41%-1.63%)                   | 20 (5-42)                |
|                            | 80+     | 2,664 (152,615)  | 1.75% (1.68%-1.81%)                  | 19 (4-48)                 | Unk                 | 4,260 (264,065)  | 1.61% (1.57%-1.66%)                   | 21 (5-50)                |
| Main bronchus              | 0 - 18  | 696 (28,467)     | 2.44% (2.27%-2.62%)                  | 8 (2-25)                  | 1 <sup>st</sup>     | 13 (489)         | 2.66% (1.23%-4.08%)                   | 15 (2-30)                |
|                            | 19 - 40 | 0 (12)           | NA <sup>***</sup>                    | NA <sup>***</sup>         | 2 <sup>nd</sup>     | 138 (978)        | 14.11% (11.93%-16.29%) <sup>***</sup> | 4 (1-12) <sup>ns</sup>   |
|                            | 41 - 60 | 14 (152)         | 9.21% (4.61%-13.81%)                 | 8 (3-17)                  | 3 <sup>rd</sup>     | 246 (1,687)      | 14.58% (12.90%-16.27%)                | 3 (1-10)                 |
|                            | 61 - 80 | 543 (3,311)      | 16.40% (15.14%-17.66%)               | 5 (1-13)                  | 4 <sup>th</sup>     | 363 (2,026)      | 17.92% (16.25%-19.59%)                | 3 (1-9)                  |
|                            | 80+     | 1,106 (6,475)    | 17.08% (16.16%-18.00%)               | 3 (1-9)                   | Unk                 | 1,103 (6,176)    | 17.86% (16.90%-18.81%)                | 4 (1-10)                 |
| Oesophagus                 | 0 - 18  | 190 (928)        | 20.47% (17.88%-23.07%)               | 1 (0-6)                   | 1 <sup>st</sup>     | 3 (11)           | NA                                    | 2 (0-11)                 |
|                            | 19 - 40 | 0 (2)            | NA <sup>*</sup>                      | NA <sup>***</sup>         | 2 <sup>nd</sup>     | 116 (1,161)      | 9.99% (8.27%-11.72%) <sup>ns</sup>    | 4 (1-8) <sup>*</sup>     |
|                            | 41 - 60 | 35 (251)         | 13.94% (9.66%-18.23%)                | 6 (2-13)                  | 3 <sup>rd</sup>     | 215 (2,419)      | 8.89% (7.75%-10.02%)                  | 4 (1-8)                  |
|                            | 61 - 80 | 621 (6,005)      | 10.34% (9.57%-11.11%)                | 4 (2-10)                  | 4 <sup>th</sup>     | 273 (2,967)      | 9.20% (8.16%-10.24%)                  | 3 (1-8)                  |
|                            | 80+     | 1,117 (11,404)   | 9.79% (9.25%-10.34%)                 | 4 (1-10)                  | Unk                 | 1,367 (13,474)   | 10.15% (9.64%-10.66%)                 | 4 (1-10)                 |
| Stomach                    | 0 - 18  | 203 (2,406)      | 8.44% (7.33%-9.55%)                  | 2 (1-5)                   | 1 <sup>st</sup>     | 5 (47)           | 10.64% (1.82%-19.45%)                 | 1 (1-7)                  |
|                            | 19 - 40 | 4 (20)           | NA <sup>***</sup>                    | 6.5 (3-10) <sup>***</sup> | 2 <sup>nd</sup>     | 81 (1,549)       | 5.23% (4.12%-6.34%) <sup>ns</sup>     | 3 (1-9) <sup>ns</sup>    |
|                            | 41 - 60 | 99 (1,426)       | 6.94% (5.62%-8.26%)                  | 3 (1-7)                   | 3 <sup>rd</sup>     | 168 (2,947)      | 5.70% (4.86%-6.54%)                   | 3 (1-9)                  |
|                            | 61 - 80 | 564 (9,413)      | 5.99% (5.51%-6.47%)                  | 4 (1-11)                  | 4 <sup>th</sup>     | 196 (3,669)      | 5.34% (4.61%-6.07%)                   | 3 (1-8)                  |
|                            | 80+     | 864 (15,714)     | 5.50% (5.14%-5.85%)                  | 3 (1-9)                   | Unk                 | 1,299 (23,556)   | 5.51% (5.22%-5.81%)                   | 3 (1-10)                 |
| Liver <sup>d</sup>         | 0 - 18  | 225 (5,252)      | 4.28% (3.74%-4.83%)                  | 2 (1-6)                   | 1 <sup>st</sup>     | 12 (104)         | 11.54% (5.40%-17.68%)                 | 3.5 (1-7.5)              |
|                            | 19 - 40 | 13 (78)          | 16.67% (8.40%-24.94%) <sup>***</sup> | 7 (1-21) <sup>***</sup>   | 2 <sup>nd</sup>     | 105 (1,296)      | 8.10% (6.62%-9.59%) <sup>ns</sup>     | 2 (0-8) <sup>ns</sup>    |
|                            | 41 - 60 | 76 (549)         | 13.84% (10.95%-16.73%)               | 6 (1-14)                  | 3 <sup>rd</sup>     | 237 (2,759)      | 8.59% (7.54%-9.64%)                   | 2 (0-6)                  |
|                            | 61 - 80 | 856 (9,324)      | 9.18% (8.59%-9.77%)                  | 2 (1-7)                   | 4 <sup>th</sup>     | 303 (3,571)      | 8.49% (7.57%-9.40%)                   | 2 (0-6)                  |
|                            | 80+     | 1,117 (14,052)   | 7.95% (7.50%-8.40%)                  | 2 (0-5)                   | Unk                 | 1,594 (18,599)   | 8.57% (8.17%-8.97%)                   | 2 (1-6)                  |
| Extrahepatic biliary tract | 0 - 18  | 183 (2,264)      | 8.08% (6.96%-9.21%)                  | 2 (1-5)                   | 1 <sup>st</sup>     | 6 (42)           | 14.29% (3.70%-24.87%)                 | 1.5 (0-5)                |
|                            | 19 - 40 | 1 (5)            | NA <sup>***</sup>                    | 3 (3-3) <sup>***</sup>    | 2 <sup>nd</sup>     | 18 (607)         | 2.97% (1.62%-4.31%) <sup>***</sup>    | 4 (2-12) <sup>ns</sup>   |
|                            | 41 - 60 | 19 (270)         | 7.04% (3.99%-10.09%)                 | 10 (3-18)                 | 3 <sup>rd</sup>     | 80 (1,283)       | 6.24% (4.91%-7.56%)                   | 3 (1-8)                  |
|                            | 61 - 80 | 229 (3,546)      | 6.46% (5.65%-7.27%)                  | 4 (2-10)                  | 4 <sup>th</sup>     | 115 (1,904)      | 6.04% (4.97%-7.11%)                   | 3 (1-8)                  |
|                            | 80+     | 510 (7,873)      | 6.48% (5.93%-7.02%)                  | 3 (1-8)                   | Unk                 | 660 (10,424)     | 6.33% (5.86%-6.80%)                   | 3 (1-8)                  |
| Pancreas                   | 0 - 18  | 117 (2,544)      | 4.60% (3.79%-5.41%)                  | 2 (0-5)                   | 1 <sup>st</sup>     | 3 (20)           | NA                                    | 1 (0-9)                  |
|                            | 19 - 40 | 2 (53)           | NA <sup>***</sup>                    | 11 (3-19) <sup>***</sup>  | 2 <sup>nd</sup>     | 288 (2,569)      | 11.21% (9.99%-12.43%) <sup>ns</sup>   | 2 (1-5) <sup>***</sup>   |
|                            | 41 - 60 | 73 (992)         | 7.36% (5.73%-8.98%)                  | 4 (2-10)                  | 3 <sup>rd</sup>     | 577 (5,213)      | 11.07% (10.22%-11.92%)                | 2 (1-6)                  |
|                            | 61 - 80 | 1,418 (14,277)   | 9.93% (9.44%-10.42%)                 | 3 (1-9)                   | 4 <sup>th</sup>     | 736 (7,090)      | 10.38% (9.67%-11.09%)                 | 3 (1-7)                  |
|                            | 80+     | 3,418 (30,171)   | 11.33% (10.97%-11.69%)               | 3 (1-8)                   | Unk                 | 4,070 (37,519)   | 10.85% (10.53%-11.16%)                | 3 (1-8)                  |
| Small intestine            | 0 - 18  | 771 (6,949)      | 11.10% (10.36%-11.83%)               | 2 (0-4)                   | 1 <sup>st</sup>     | 11 (51)          | 21.57% (10.28%-32.86%)                | 2 (0-5)                  |
|                            | 19 - 40 | 0 (10)           | NA <sup>*</sup>                      | NA <sup>***</sup>         | 2 <sup>nd</sup>     | 9 (569)          | 1.58% (0.56%-2.61%) <sup>ns</sup>     | 8 (2-13) <sup>ns</sup>   |
|                            | 41 - 60 | 6 (423)          | 1.42% (0.29%-2.55%)                  | 12.5 (0-28.5)             | 3 <sup>rd</sup>     | 30 (1,079)       | 2.78% (1.80%-3.76%)                   | 7 (2-21)                 |
|                            | 61 - 80 | 65 (3,397)       | 1.91% (1.45%-2.37%)                  | 10 (3-37)                 | 4 <sup>th</sup>     | 34 (1,441)       | 2.36% (1.58%-3.14%)                   | 6 (1-17)                 |
|                            | 80+     | 134 (4,702)      | 2.85% (2.37%-3.33%)                  | 8 (2-22)                  | Unk                 | 166 (6,535)      | 2.54% (2.16%-2.92%)                   | 8 (2-22)                 |
| Colon & rectum             | 0 - 18  | 34 (1,096)       | 3.10% (2.08%-4.13%)                  | 2 (1-6)                   | 1 <sup>st</sup>     | 0 (4)            | NA                                    | NA                       |
|                            | 19 - 40 | 5 (63)           | 7.94% (1.26%-14.61%) <sup>***</sup>  | 14 (10-19) <sup>***</sup> | 2 <sup>nd</sup>     | 582 (11,025)     | 5.28% (4.86%-5.70%) <sup>*</sup>      | 11 (3-24) <sup>*</sup>   |
|                            | 41 - 60 | 378 (7,048)      | 5.36% (4.84%-5.89%)                  | 19 (9-33)                 | 3 <sup>rd</sup>     | 1,104 (20,099)   | 5.49% (5.18%-5.81%)                   | 10 (2-24)                |
|                            | 61 - 80 | 3,563 (63,836)   | 5.58% (5.40%-5.76%)                  | 16 (6-30)                 | 4 <sup>th</sup>     | 1,300 (26,182)   | 4.97% (4.70%-5.23%)                   | 11 (3-25)                |
|                            | 80+     | 4,507 (86,417)   | 5.22% (5.07%-5.36%)                  | 10 (2-24)                 | Unk                 | 6,629 (128,812)  | 5.15% (5.03%-5.27%)                   | 12 (3-26)                |
| Right colon                | 0 - 18  | 1,192 (29,175)   | 4.09% (3.86%-4.31%)                  | 3 (1-11)                  | 1 <sup>st</sup>     | 30 (421)         | 7.13% (4.67%-9.58%)                   | 7 (4-17)                 |
|                            | 19 - 40 | 0 (19)           | NA <sup>***</sup>                    | NA <sup>***</sup>         | 2 <sup>nd</sup>     | 194 (4,207)      | 4.61% (3.98%-5.25%) <sup>***</sup>    | 9 (2-21) <sup>ns</sup>   |
|                            | 41 - 60 | 57 (1,661)       | 3.43% (2.56%-4.31%)                  | 15 (6-30)                 | 3 <sup>rd</sup>     | 327 (8,069)      | 4.05% (3.62%-4.48%)                   | 8 (2-20)                 |
|                            | 61 - 80 | 832 (17,008)     | 4.89% (4.57%-5.22%)                  | 12 (3-23)                 | 4 <sup>th</sup>     | 358 (10,493)     | 3.41% (3.06%-3.76%)                   | 7 (2-20)                 |
|                            | 80+     | 1,433 (37,019)   | 3.87% (3.67%-4.07%)                  | 9 (2-21)                  | Unk                 | 1,890 (49,468)   | 3.82% (3.65%-3.99%)                   | 9 (2-21)                 |
| Left colon                 | 0 - 18  | 455 (16,676)     | 2.73% (2.48%-2.98%)                  | 3 (1-10)                  | 1 <sup>st</sup>     | 8 (146)          | 5.48% (1.79%-9.17%)                   | 13 (5.5-24)              |
|                            | 19 - 40 | 1 (22)           | NA <sup>*</sup>                      | 19 (19-19) <sup>***</sup> | 2 <sup>nd</sup>     | 193 (3,846)      | 5.02% (4.33%-5.71%) <sup>ns</sup>     | 12 (4-24) <sup>***</sup> |
|                            | 41 - 60 | 167 (2,791)      | 5.98% (5.10%-6.86%)                  | 20 (12-37)                | 3 <sup>rd</sup>     | 400 (6,667)      | 6.00% (5.43%-6.57%)                   | 13 (3-25)                |
|                            | 61 - 80 | 1,357 (25,121)   | 5.40% (5.12%-5.68%)                  | 18 (6-33)                 | 4 <sup>th</sup>     | 455 (8,703)      | 5.23% (4.76%-5.70%)                   | 13 (3-26)                |
|                            | 80+     | 1,512 (28,653)   | 5.28% (5.02%-5.54%)                  | 11 (3-25)                 | Unk                 | 2,311 (44,629)   | 5.18% (4.97%-5.38%)                   | 14 (4-29)                |
| Unspecified colon          | 0 - 18  | 333 (7,427)      | 4.48% (4.01%-4.95%)                  | 3 (1-11)                  | 1 <sup>st</sup>     | 11 (169)         | 6.51% (2.79%-10.23%)                  | 5 (2-11)                 |
|                            | 19 - 40 | 1 (4)            | NA <sup>ns</sup>                     | 0 (0-0) <sup>***</sup>    | 2 <sup>nd</sup>     | 44 (309)         | 14.24% (10.34%-18.14%) <sup>ns</sup>  | 5 (2-12) <sup>*</sup>    |
|                            | 41 - 60 | 24 (160)         | 15.00% (9.47%-20.53%)                | 6 (1-18)                  | 3 <sup>rd</sup>     | 83 (515)         | 16.12% (12.94%-19.29%)                | 2 (0-9)                  |
|                            | 61 - 80 | 210 (1,290)      | 16.28% (14.26%-18.29%)               | 6 (1-17)                  | 4 <sup>th</sup>     | 106 (660)        | 16.06% (13.26%-18.86%)                | 4 (1-19)                 |
|                            | 80+     | 367 (2,287)      | 16.05% (14.54%-17.55%)               | 3 (1-12)                  |                     | 513 (3,239)      | 15.84% (14.58%-17.10%)                | 3 (1-13)                 |

|                   |         |                |                                       |                           |                 |                |                                     |                         |
|-------------------|---------|----------------|---------------------------------------|---------------------------|-----------------|----------------|-------------------------------------|-------------------------|
|                   | 80+     | 144 (986)      | 14.60% (12.40%-16.81%)                | 1 (0-6)                   | Unk             | 0 (4)          | NA                                  | NA                      |
| Rectum            | 0 - 18  | 3 (18)         | NA <sup>***</sup>                     | 14 (10-40) <sup>***</sup> | 1 <sup>st</sup> | 151 (2,663)    | 5.67% (4.79%-6.55%) <sup>ns</sup>   | 17 (7-30) <sup>ns</sup> |
|                   | 19 - 40 | 130 (2,436)    | 5.34% (4.44%-6.23%)                   | 24 (10-37)                | 2 <sup>nd</sup> | 294 (4,848)    | 6.06% (5.39%-6.74%)                 | 13 (4-27)               |
|                   | 41 - 60 | 1,164 (20,417) | 5.70% (5.38%-6.02%)                   | 19 (8-34)                 | 3 <sup>rd</sup> | 381 (6,326)    | 6.02% (5.44%-6.61%)                 | 15 (4-28)               |
|                   | 61 - 80 | 1,195 (18,458) | 6.47% (6.12%-6.83%)                   | 13 (4-27)                 | 4 <sup>th</sup> | 1,915 (31,476) | 6.08% (5.82%-6.35%)                 | 16 (6-30)               |
| Anus              | 80+     | 260 (4,086)    | 6.36% (5.61%-7.11%)                   | 6 (2-18)                  | Unk             | 11 (102)       | 10.78% (4.76%-16.80%)               | 11 (6-17)               |
|                   | 0 - 18  | NA ( )         | #VALUE!                               | NA                        | 1 <sup>st</sup> | 9 (469)        | 1.92% (0.68%-3.16%) <sup>ns</sup>   | 10 (6-12) <sup>ns</sup> |
|                   | 19 - 40 | 7 (313)        | 2.24% (0.60%-3.87%)                   | 11.5 (6-21)               | 2 <sup>nd</sup> | 20 (977)       | 2.05% (1.16%-2.94%)                 | 13 (5-23)               |
|                   | 41 - 60 | 76 (4,446)     | 1.71% (1.33%-2.09%)                   | 15 (6-46)                 | 3 <sup>rd</sup> | 24 (1,327)     | 1.81% (1.09%-2.53%)                 | 11 (6-36)               |
| Other GI          | 61 - 80 | 81 (3,864)     | 2.10% (1.64%-2.55%)                   | 10 (5-17)                 | 4 <sup>th</sup> | 129 (6,623)    | 1.95% (1.61%-2.28%)                 | 11 (5-22)               |
|                   | 80+     | 19 (782)       | 2.43% (1.35%-3.51%)                   | 6 (3-9)                   | Unk             | 1 (9)          | NA                                  | 6 (6-6)                 |
|                   | 0 - 18  | 1 (323)        | NA <sup>***</sup>                     | 2 (2-2) <sup>***</sup>    | 1 <sup>st</sup> | 17 (364)       | 4.67% (2.50%-6.84%) <sup>ns</sup>   | 0 (0-2) <sup>ns</sup>   |
|                   | 19 - 40 | 21 (1,350)     | 1.56% (0.90%-2.22%)                   | 8 (2-18)                  | 2 <sup>nd</sup> | 65 (791)       | 8.22% (6.30%-10.13%)                | 2 (0-8)                 |
| Kidney            | 41 - 60 | 171 (3,145)    | 5.44% (4.64%-6.23%)                   | 3 (1-9)                   | 3 <sup>rd</sup> | 99 (1,132)     | 8.75% (7.10%-10.39%)                | 2 (1-6)                 |
|                   | 61 - 80 | 376 (3,117)    | 12.06% (10.92%-13.21%)                | 2 (0-7)                   | 4 <sup>th</sup> | 496 (6,309)    | 7.86% (7.20%-8.53%)                 | 2 (0-7)                 |
|                   | 80+     | 111 (676)      | 16.42% (13.63%-19.21%)                | 1 (0-2)                   | Unk             | 3 (15)         | NA                                  | 0 (0-2)                 |
|                   | 0 - 18  | 7 (76)         | 9.21% (2.71%-15.71%) <sup>***</sup>   | 7 (3-9) <sup>***</sup>    | 1 <sup>st</sup> | 330 (3,892)    | 8.48% (7.60%-9.35%) <sup>ns</sup>   | 6 (2-14) <sup>***</sup> |
| Bladder           | 19 - 40 | 168 (4,390)    | 3.83% (3.26%-4.39%)                   | 9 (4-20)                  | 2 <sup>nd</sup> | 671 (7,738)    | 8.67% (8.04%-9.30%)                 | 7 (2-20)                |
|                   | 41 - 60 | 2,316 (28,812) | 8.04% (7.72%-8.35%)                   | 9 (3-26)                  | 3 <sup>rd</sup> | 922 (10,582)   | 8.71% (8.18%-9.25%)                 | 8 (2-21)                |
|                   | 61 - 80 | 2,936 (32,761) | 8.96% (8.65%-9.27%)                   | 7 (2-22)                  | 4 <sup>th</sup> | 3,890 (47,276) | 8.23% (7.98%-8.48%)                 | 8 (3-23)                |
|                   | 80+     | 396 (3,566)    | 11.10% (10.07%-12.14%)                | 3 (1-9)                   | Unk             | 10 (117)       | 8.55% (3.48%-13.61%)                | 5.5 (1-12.5)            |
| Prostate          | 0 - 18  | 1 (3)          | NA <sup>***</sup>                     | 28 (28-28) <sup>***</sup> | 1 <sup>st</sup> | 70 (1,883)     | 3.72% (2.86%-4.57%) <sup>*</sup>    | 3 (1-12) <sup>ns</sup>  |
|                   | 19 - 40 | 16 (335)       | 4.78% (2.49%-7.06%)                   | 6 (3.5-18)                | 2 <sup>nd</sup> | 147 (4,184)    | 3.51% (2.96%-4.07%)                 | 5 (2-10)                |
|                   | 41 - 60 | 251 (7,506)    | 3.34% (2.94%-3.75%)                   | 6 (2-13)                  | 3 <sup>rd</sup> | 168 (5,685)    | 2.96% (2.51%-3.40%)                 | 4 (1-11)                |
|                   | 61 - 80 | 676 (23,734)   | 2.85% (2.64%-3.06%)                   | 4 (1-11)                  | 4 <sup>th</sup> | 829 (29,886)   | 2.77% (2.59%-2.96%)                 | 4 (1-11)                |
| Testis            | 80+     | 271 (10,090)   | 2.69% (2.37%-3.00%)                   | 3 (1-7)                   | Unk             | 1 (30)         | NA                                  | 1 (1-1)                 |
|                   | 0 - 18  | 0 (0)          | NA                                    | NA                        | 1 <sup>st</sup> | 58 (15,969)    | 0.36% (0.27%-0.46%) <sup>ns</sup>   | 24 (8-77) <sup>ns</sup> |
|                   | 19 - 40 | 1 (304)        | NA                                    | NA (NA-NA)                | 2 <sup>nd</sup> | 147 (32,744)   | 0.45% (0.38%-0.52%)                 | 23 (7-NA)               |
|                   | 41 - 60 | 276 (87,961)   | 0.31% (0.28%-0.35%)                   | 31 (11-NA)                | 3 <sup>rd</sup> | 164 (40,214)   | 0.41% (0.35%-0.47%)                 | 19 (6-42)               |
| Other GU          | 61 - 80 | 811 (204,869)  | 0.40% (0.37%-0.42%)                   | 25 (9-67)                 | 4 <sup>th</sup> | 969 (220,818)  | 0.44% (0.41%-0.47%)                 | 22 (9-62)               |
|                   | 80+     | 251 (16,784)   | 1.50% (1.31%-1.68%)                   | 11 (3-28)                 | Unk             | 1 (173)        | NA                                  | 8 (8-8)                 |
|                   | 0 - 18  | 77 (650)       | 11.85% (9.36%-14.33%) <sup>***</sup>  | NA (NA-NA)                | 1 <sup>st</sup> | 40 (546)       | 7.33% (5.14%-9.51%) <sup>ns</sup>   | NA (36-NA)              |
|                   | 19 - 40 | 850 (11,072)   | 7.68% (7.18%-8.17%)                   | NA (20-NA)                | 2 <sup>nd</sup> | 95 (1,159)     | 8.20% (6.62%-9.78%)                 | NA (23-NA)              |
| Ovary             | 41 - 60 | 176 (3,710)    | 4.74% (4.06%-5.43%)                   | NA (11-NA)                | 3 <sup>rd</sup> | 162 (2,044)    | 7.93% (6.75%-9.10%)                 | NA (26-NA)              |
|                   | 61 - 80 | 25 (426)       | 5.87% (3.64%-8.10%)                   | 12 (2-NA)                 | 4 <sup>th</sup> | 831 (12,100)   | 6.87% (6.42%-7.32%)                 | NA (19-NA)              |
|                   | 80+     | 1 (23)         | NA                                    | NA (NA-NA)                | Unk             | 1 (32)         | NA                                  | NA (NA-NA)              |
|                   | 0 - 18  | 0 (2)          | NA <sup>ns</sup>                      | NA <sup>***</sup>         | 1 <sup>st</sup> | 20 (475)       | 4.21% (2.40%-6.02%) <sup>ns</sup>   | 5 (1-7) <sup>ns</sup>   |
| Uterus            | 19 - 40 | 8 (146)        | 5.48% (1.79%-9.17%)                   | 5.5 (5-10)                | 2 <sup>nd</sup> | 50 (853)       | 5.86% (4.29%-7.44%)                 | 4 (2-9)                 |
|                   | 41 - 60 | 98 (1,784)     | 5.49% (4.44%-6.55%)                   | 6 (2-14)                  | 3 <sup>rd</sup> | 78 (1,262)     | 6.18% (4.85%-7.51%)                 | 5 (2-11)                |
|                   | 61 - 80 | 315 (4,892)    | 6.44% (5.75%-7.13%)                   | 6 (2-14)                  | 4 <sup>th</sup> | 379 (6,119)    | 6.19% (5.59%-6.80%)                 | 5 (2-13)                |
|                   | 80+     | 108 (1,894)    | 5.70% (4.66%-6.75%)                   | 2 (1-6)                   | Unk             | 2 (9)          | NA                                  | 5.5 (4-7)               |
| Cervix            | 0 - 18  | 7 (446)        | 1.57% (0.42%-2.72%) <sup>***</sup>    | 48 (34-NA) <sup>***</sup> | 1 <sup>st</sup> | 73 (1,190)     | 6.13% (4.77%-7.50%) <sup>ns</sup>   | 8 (2-25) <sup>***</sup> |
|                   | 19 - 40 | 60 (2,520)     | 2.38% (1.79%-2.98%)                   | 12 (4-39)                 | 2 <sup>nd</sup> | 142 (2,517)    | 5.64% (4.74%-6.54%)                 | 5 (1-24)                |
|                   | 41 - 60 | 493 (11,865)   | 4.16% (3.80%-4.51%)                   | 23 (5-50)                 | 3 <sup>rd</sup> | 213 (3,669)    | 5.81% (5.05%-6.56%)                 | 12 (3-31)               |
|                   | 61 - 80 | 902 (12,264)   | 7.35% (6.89%-7.82%)                   | 17 (2-34)                 | 4 <sup>th</sup> | 1,268 (22,390) | 5.66% (5.36%-5.97%)                 | 18 (3-38)               |
| Other GYN         | 80+     | 234 (2,694)    | 8.69% (7.62%-9.75%)                   | 3 (1-13)                  | Unk             | 0 (23)         | NA                                  | NA                      |
|                   | 0 - 18  | 0 (7)          | NA <sup>***</sup>                     | NA <sup>*</sup>           | 1 <sup>st</sup> | 75 (3,093)     | 2.42% (1.88%-2.97%) <sup>***</sup>  | 8 (1-21) <sup>ns</sup>  |
|                   | 19 - 40 | 35 (3,192)     | 1.10% (0.74%-1.46%)                   | 8 (1-NA)                  | 2 <sup>nd</sup> | 128 (6,408)    | 2.00% (1.65%-2.34%)                 | 8 (2-20)                |
|                   | 41 - 60 | 421 (30,250)   | 1.39% (1.26%-1.52%)                   | 7 (2-24)                  | 3 <sup>rd</sup> | 168 (9,065)    | 1.85% (1.58%-2.13%)                 | 8 (1-24)                |
| Bone tumor        | 61 - 80 | 677 (35,825)   | 1.89% (1.75%-2.03%)                   | 9 (2-23)                  | 4 <sup>th</sup> | 860 (54,721)   | 1.57% (1.47%-1.68%)                 | 8 (2-22)                |
|                   | 80+     | 99 (4,068)     | 2.43% (1.96%-2.91%)                   | 6 (2-14)                  | Unk             | 1 (55)         | NA                                  | NA (NA-NA)              |
|                   | 0 - 18  | 1 (9)          | NA <sup>***</sup>                     | 5 (5-5) <sup>***</sup>    | 1 <sup>st</sup> | 57 (1,184)     | 4.81% (3.59%-6.03%) <sup>ns</sup>   | 7 (4-24) <sup>ns</sup>  |
|                   | 19 - 40 | 98 (6,125)     | 1.60% (1.29%-1.91%)                   | 10 (4-20)                 | 2 <sup>nd</sup> | 94 (2,235)     | 4.21% (3.37%-5.04%)                 | 8 (3-18)                |
| Skin melanoma     | 41 - 60 | 393 (9,634)    | 4.08% (3.68%-4.47%)                   | 7 (3-18)                  | 3 <sup>rd</sup> | 113 (2,857)    | 3.96% (3.24%-4.67%)                 | 6 (2-15)                |
|                   | 61 - 80 | 302 (4,203)    | 7.19% (6.40%-7.97%)                   | 7 (2-16)                  | 4 <sup>th</sup> | 578 (14,353)   | 4.03% (3.71%-4.35%)                 | 7 (3-17)                |
|                   | 80+     | 50 (687)       | 7.28% (5.34%-9.22%)                   | 4 (2-9)                   | Unk             | 2 (29)         | NA                                  | NA (NA-NA)              |
|                   | 0 - 18  | 0 (3)          | NA <sup>ns</sup>                      | NA <sup>***</sup>         | 1 <sup>st</sup> | 20 (623)       | 3.21% (1.83%-4.59%) <sup>ns</sup>   | 7 (1-NA) <sup>*</sup>   |
| STS               | 19 - 40 | 12 (398)       | 3.02% (1.34%-4.70%)                   | 20 (5-NA)                 | 2 <sup>nd</sup> | 56 (1,120)     | 5.00% (3.72%-6.28%)                 | 5 (1-20)                |
|                   | 41 - 60 | 148 (3,405)    | 4.35% (3.66%-5.03%)                   | 6 (1-24)                  | 3 <sup>rd</sup> | 66 (1,587)     | 4.16% (3.18%-5.14%)                 | 2 (0-14)                |
|                   | 61 - 80 | 224 (4,921)    | 4.55% (3.97%-5.13%)                   | 5 (1-23)                  | 4 <sup>th</sup> | 314 (7,167)    | 4.38% (3.91%-4.86%)                 | 6 (1-24)                |
|                   | 80+     | 73 (1,787)     | 4.09% (3.17%-5.00%)                   | 3 (0-10)                  | Unk             | 1 (17)         | NA                                  | 5 (5-5)                 |
| Non-skin melanoma | 0 - 18  | 264 (1,489)    | 17.73% (15.79%-19.67%) <sup>***</sup> | 35 (17-NA) <sup>***</sup> | 1 <sup>st</sup> | 25 (184)       | 13.59% (8.64%-18.54%) <sup>ns</sup> | 17 (9-NA) <sup>ns</sup> |
|                   | 19 - 40 | 131 (1,286)    | 10.19% (8.53%-11.84%)                 | 18 (10-47)                | 2 <sup>nd</sup> | 56 (457)       | 12.25% (9.25%-15.26%)               | 18 (7-46)               |
|                   | 41 - 60 | 100 (1,248)    | 8.01% (6.51%-9.52%)                   | 8 (3-18)                  | 3 <sup>rd</sup> | 82 (672)       | 12.20% (9.73%-14.68%)               | 20 (7-47)               |
|                   | 61 - 80 | 93 (868)       | 10.71% (8.66%-12.77%)                 | 9 (3-23)                  | 4 <sup>th</sup> | 445 (3,756)    | 11.85% (10.81%-12.88%)              | 19 (8-NA)               |
| Skin melanoma     | 80+     | 21 (188)       | 11.17% (6.67%-15.67%)                 | 4 (1-7)                   | Unk             | 1 (10)         | NA                                  | 9 (9-9)                 |
|                   | 0 - 18  | 149 (1,533)    | 9.72% (8.24%-11.20%) <sup>***</sup>   | 23 (10-NA) <sup>***</sup> | 1 <sup>st</sup> | 104 (1,049)    | 9.91% (8.11%-11.72%) <sup>*</sup>   | 12 (2-22) <sup>ns</sup> |
|                   | 19 - 40 | 323 (4,083)    | 7.91% (7.08%-8.74%)                   | 15 (5-32)                 | 2 <sup>nd</sup> | 223 (2,204)    | 10.12% (8.86%-11.38%)               | 7 (2-21)                |
|                   | 41 - 60 | 804 (8,794)    | 9.14% (8.54%-9.74%)                   | 10 (3-24)                 | 3 <sup>rd</sup> | 274 (3,258)    | 8.41% (7.46%-9.36%)                 | 9 (3-22)                |
| Non-skin melanoma | 61 - 80 | 755 (8,387)    | 9.00% (8.39%-9.61%)                   | 5 (1-17)                  | 4 <sup>th</sup> | 1,580 (18,557) | 8.51% (8.11%-8.92%)                 | 8 (2-23)                |
|                   | 80+     | 150 (2,296)    | 6.53% (5.52%-7.54%)                   | 2 (1-7)                   | Unk             | 0 (25)         | NA                                  | NA                      |
|                   | 0 - 18  | 1 (463)        | NA <sup>***</sup>                     | 0 (0-0) <sup>***</sup>    | 1 <sup>st</sup> | 37 (3,516)     | 1.05% (0.72%-1.39%) <sup>ns</sup>   | 7 (4-27) <sup>*</sup>   |
|                   | 19 - 40 | 70 (12,839)    | 0.55% (0.42%-0.67%)                   | 10 (4-22)                 | 2 <sup>nd</sup> | 84 (8,156)     | 1.03% (0.81%-1.25%)                 | 5 (1-12)                |
| Non-skin melanoma | 41 - 60 | 337 (38,800)   | 0.87% (0.78%-0.96%)                   | 9 (3-23)                  | 3 <sup>rd</sup> | 150 (14,272)   | 1.05% (0.88%-1.22%)                 | 5 (2-11)                |
|                   | 61 - 80 | 499 (43,874)   | 1.14% (1.04%-1.24%)                   | 5 (2-19)                  | 4 <sup>th</sup> | 794 (81,305)   | 0.98% (0.91%-1.04%)                 | 7 (2-22)                |
|                   | 80+     | 158 (11,311)   | 1.40% (1.18%-1.61%)                   | 6 (2-13)                  | Unk             | 0 (38)         | NA                                  | NA                      |
|                   | 0 - 18  | 0 (14)         | NA <sup>ns</sup>                      | NA <sup>*</sup>           | 1 <sup>st</sup> | 4 (149)        | NA <sup>ns</sup>                    | 10 (4-38) <sup>ns</sup> |
| Non-skin melanoma | 19 - 40 | 6 (236)        | 2.54% (0.53%-4.55%)                   | 13 (7-27)                 | 2 <sup>nd</sup> | 9 (281)        | 3.20% (1.14%-5.26%)                 | 10 (1-18)               |
|                   | 41 - 60 | 27 (1,004)     | 2.69% (1.69%-3.69%)                   | 7 (5-NA)                  | 3 <sup>rd</sup> | 13 (463)       | 2.81% (1.30%-4.31%)                 | 5 (3-6)                 |
|                   | 61 - 80 | 56 (1,434)     | 3.91% (2.90%-4.91%)                   | 6 (3-14)                  | 4 <sup>th</sup> | 80 (2,187)     | 3.66% (2.87%-4.44%)                 | 6 (3-14)                |
|                   | 80+     | 17 (396)       | 4.29% (2.30%-6.29%)                   | 4 (2-6)                   | Unk             | 0 (4)          | NA                                  | NA                      |

|                  |         |                |                                    |                           |                 |                |                                    |                         |
|------------------|---------|----------------|------------------------------------|---------------------------|-----------------|----------------|------------------------------------|-------------------------|
| Skin cancer      | 0 - 18  | 0 (15)         | NA <sup>ns</sup>                   | NA <sup>ns</sup>          | 1 <sup>st</sup> | 2 (203)        | NA <sup>ns</sup>                   | 16.5 (6-NA)             |
|                  | 19 - 40 | 0 (158)        | NA                                 | NA                        | 2 <sup>nd</sup> | 5 (504)        | 0.99% (0.13%-1.86%)                | 10 (8-11)               |
|                  | 41 - 60 | 12 (1,013)     | 1.18% (0.52%-1.85%)                | 17 (6.5-48.5)             | 3 <sup>rd</sup> | 1 (700)        | NA                                 | 25 (25-25)              |
|                  | 61 - 80 | 16 (2,683)     | 0.60% (0.31%-0.89%)                | 9 (5-11)                  | 4 <sup>th</sup> | 29 (3,934)     | 0.74% (0.47%-1.00%)                | 8 (5-18)                |
|                  | 80+     | 9 (1,476)      | 0.61% (0.21%-1.01%)                | 10 (6-21)                 | Unk             | 0 (4)          | NA                                 | NA                      |
| Embryonal tumors | 0 - 18  | 312 (3,524)    | 8.85% (7.92%-9.79%) <sup>***</sup> | NA (33-NA)                | 1 <sup>st</sup> | 11 (157)       | 7.01% (3.01%-11.00%) <sup>ns</sup> | 16 (4-57) <sup>*</sup>  |
|                  | 19 - 40 | 8 (311)        | 2.57% (0.81%-4.33%)                | 50 (6-NA)                 | 2 <sup>nd</sup> | 30 (396)       | 7.58% (4.97%-10.18%)               | NA (12-NA)              |
|                  | 41 - 60 | 5 (260)        | 1.92% (0.25%-3.59%)                | 16 (3-16)                 | 3 <sup>rd</sup> | 49 (575)       | 8.52% (6.24%-10.80%)               | NA (16-NA)              |
|                  | 61 - 80 | 9 (170)        | 5.29% (1.93%-8.66%)                | 4 (1-12)                  | 4 <sup>th</sup> | 243 (3,140)    | 7.74% (6.80%-8.67%)                | NA (26-NA)              |
|                  | 80+     | 0 (16)         | NA                                 | NA                        | Unk             | 1 (13)         | NA                                 | NA (NA-NA)              |
| All other        | 0 - 18  | 52 (997)       | 5.22% (3.84%-6.60%) <sup>***</sup> | 46 (16-NA) <sup>***</sup> | 1 <sup>st</sup> | 135 (1,566)    | 8.62% (7.23%-10.01%) <sup>ns</sup> | 2 (0-10) <sup>***</sup> |
|                  | 19 - 40 | 285 (2,497)    | 11.41% (10.17%-12.66%)             | 24 (6-NA)                 | 2 <sup>nd</sup> | 264 (3,194)    | 8.27% (7.31%-9.22%)                | 4 (1-13)                |
|                  | 41 - 60 | 828 (9,649)    | 8.58% (8.02%-9.14%)                | 7 (1-31)                  | 3 <sup>rd</sup> | 368 (4,271)    | 8.62% (7.77%-9.46%)                | 5 (1-20)                |
|                  | 61 - 80 | 1,340 (15,709) | 8.53% (8.09%-8.97%)                | 4 (1-13)                  | 4 <sup>th</sup> | 2,130 (24,001) | 8.87% (8.51%-9.23%)                | 5 (1-21)                |
|                  | 80+     | 398 (4,216)    | 9.44% (8.56%-10.32%)               | 2 (0-8)                   | Unk             | 6 (36)         | 16.67% (4.49%-28.84%)              | 0.5 (0-13)              |

<sup>a</sup> Prevalence was only calculated in category with more than 5 sLM cases.

<sup>b</sup> Survival data (in months) are shown as the median survival and interquartile range in cases with synchronous lung metastasis at diagnosis.

<sup>c</sup> The county-level income is presented as quantiles here.

<sup>d</sup> Liver cancer here includes hepatocellular carcinoma and intrahepatic cholangiocarcinoma.

Abbreviations: sLM: synchronous lung metastasis; AA: African American; Unk: unknown; GI: gastrointestinal cancer; GU: genitourinary cancer; GYN: gynecologic cancer; STS: soft-tissue sarcoma; NA: non-applicable; ns: non-significant; \*: p<0.05; \*\*\*: p<0.001 for intragroup survival comparison by Chi-square tests or log-rank tests.

**Supplementary Table S3.** Number of cases with synchronous lung metastasis and all cases, prevalence of synchronous lung metastasis and median survival with interquartile range by cancer type and county-level education or county-level residence type.

| Categories                 | Education <sup>a</sup> | No. of sLM (All) | Prevalence <sup>b</sup>               | Survival <sup>c</sup>    | Residence | No. of sLM (All) | Prevalence <sup>b</sup>              | Survival <sup>c</sup>    |
|----------------------------|------------------------|------------------|---------------------------------------|--------------------------|-----------|------------------|--------------------------------------|--------------------------|
| Brain                      | 1 <sup>st</sup>        | 1 (898)          | NA <sup>ns</sup>                      | 18 (18-18) <sup>ns</sup> | Metro     | 16 (24,543)      | 0.07% (0.03%-0.10%) <sup>ns</sup>    | 8 (2.5-23) <sup>ns</sup> |
|                            | 2 <sup>nd</sup>        | 1 (2,082)        | NA                                    | NA (NA-NA)               | Urban     | 1 (2,586)        | NA                                   | 18 (18-18)               |
|                            | 3 <sup>rd</sup>        | 2 (4,899)        | NA                                    | 4.5 (2-7)                | Rural     | 0 (355)          | NA                                   | NA                       |
|                            | 4 <sup>th</sup>        | 13 (19,582)      | 0.07% (0.03%-0.10%)                   | 9 (3-23)                 | Unknown   | 0 (1)            | NA                                   | NA                       |
|                            | Unk                    | 0 (24)           | NA                                    | NA                       |           |                  |                                      |                          |
| Head and neck              | 1 <sup>st</sup>        | 88 (3,637)       | 2.42% (1.92%-2.92%) <sup>ns</sup>     | 7 (3-14) <sup>*</sup>    | Metro     | 1,357 (64,650)   | 2.10% (1.99%-2.21%) <sup>ns</sup>    | 9 (3-22) <sup>***</sup>  |
|                            | 2 <sup>nd</sup>        | 148 (6,662)      | 2.22% (1.87%-2.58%)                   | 6 (2-19)                 | Urban     | 181 (8,868)      | 2.04% (1.75%-2.34%)                  | 6 (2-13)                 |
|                            | 3 <sup>rd</sup>        | 327 (14,546)     | 2.25% (2.01%-2.49%)                   | 8 (3-18)                 | Rural     | 36 (1,376)       | 2.62% (1.77%-3.46%)                  | 8 (2-15)                 |
|                            | 4 <sup>th</sup>        | 1,007 (49,932)   | 2.02% (1.89%-2.14%)                   | 9 (4-23)                 | Unknown   | 0 (3)            | NA                                   | NA                       |
|                            | Unk                    | 4 (120)          | NA                                    | 7 (4.5-15.5)             |           |                  |                                      |                          |
| Thyroid                    | 1 <sup>st</sup>        | 31 (2,175)       | 1.43% (0.93%-1.92%) <sup>*</sup>      | 7 (1-35) <sup>ns</sup>   | Metro     | 916 (71,055)     | 1.29% (1.21%-1.37%) <sup>ns</sup>    | 11 (2-83) <sup>ns</sup>  |
|                            | 2 <sup>nd</sup>        | 93 (5,316)       | 1.75% (1.40%-2.10%)                   | 11 (2-NA)                | Urban     | 71 (6,062)       | 1.17% (0.90%-1.44%)                  | 16 (1-79)                |
|                            | 3 <sup>rd</sup>        | 161 (13,052)     | 1.23% (1.04%-1.42%)                   | 8 (1-65)                 | Rural     | 9 (878)          | 1.03% (0.36%-1.69%)                  | 5 (1-22)                 |
|                            | 4 <sup>th</sup>        | 711 (57,363)     | 1.24% (1.15%-1.33%)                   | 12 (2-79)                | Unknown   | 0 (8)            | NA                                   | NA                       |
|                            | Unk                    | 0 (97)           | NA                                    | NA                       |           |                  |                                      |                          |
| Breast                     | 1 <sup>st</sup>        | 196 (10,683)     | 1.83% (1.58%-2.09%) <sup>***</sup>    | 16 (4-49) <sup>*</sup>   | Metro     | 5,385 (323,451)  | 1.66% (1.62%-1.71%) <sup>ns</sup>    | 20 (5-47) <sup>ns</sup>  |
|                            | 2 <sup>nd</sup>        | 436 (24,455)     | 1.78% (1.62%-1.95%)                   | 20 (5-40)                | Urban     | 505 (30,732)     | 1.64% (1.50%-1.79%)                  | 20 (5-47)                |
|                            | 3 <sup>rd</sup>        | 1,078 (60,599)   | 1.78% (1.67%-1.88%)                   | 18 (4-41)                | Rural     | 82 (4,398)       | 1.86% (1.46%-2.26%)                  | 18 (4-44)                |
|                            | 4 <sup>th</sup>        | 4,249 (262,423)  | 1.62% (1.57%-1.67%)                   | 21 (5-49)                | Unknown   | 0 (68)           | NA                                   | NA                       |
|                            | Unk                    | 13 (489)         | 2.66% (1.23%-4.08%)                   | 15 (2-30)                |           |                  |                                      |                          |
| Main bronchus              | 1 <sup>st</sup>        | 130 (927)        | 14.02% (11.79%-16.26%) <sup>***</sup> | 3 (1-10) <sup>ns</sup>   | Metro     | 1,554 (8,947)    | 17.37% (16.58%-18.15%) <sup>ns</sup> | 4 (1-11) <sup>ns</sup>   |
|                            | 2 <sup>nd</sup>        | 199 (1,291)      | 15.41% (13.44%-17.38%)                | 3 (1-9)                  | Urban     | 248 (1,638)      | 15.14% (13.40%-16.88%)               | 3 (1-9)                  |
|                            | 3 <sup>rd</sup>        | 382 (2,418)      | 15.80% (14.34%-17.25%)                | 4 (1-10)                 | Rural     | 51 (293)         | 17.41% (13.06%-21.75%)               | 4 (1-11)                 |
|                            | 4 <sup>th</sup>        | 1,139 (6,231)    | 18.28% (17.32%-19.24%)                | 4 (1-11)                 | Unknown   | 0 (0)            |                                      | NA                       |
|                            | Unk                    | 3 (11)           | NA                                    | 2 (0-11)                 |           |                  |                                      |                          |
| Oesophagus                 | 1 <sup>st</sup>        | 80 (869)         | 9.21% (7.28%-11.13%) <sup>ns</sup>    | 4 (1-8) <sup>ns</sup>    | Metro     | 1,727 (17,303)   | 9.98% (9.53%-10.43%) <sup>ns</sup>   | 4 (1-10) <sup>*</sup>    |
|                            | 2 <sup>nd</sup>        | 148 (1,785)      | 8.29% (7.01%-9.57%)                   | 4 (1-8)                  | Urban     | 220 (2,396)      | 9.18% (8.03%-10.34%)                 | 3 (1-8)                  |
|                            | 3 <sup>rd</sup>        | 412 (4,077)      | 10.11% (9.18%-11.03%)                 | 3 (1-9)                  | Rural     | 29 (365)         | 7.95% (5.17%-10.72%)                 | 4 (1-8)                  |
|                            | 4 <sup>th</sup>        | 1,331 (13,290)   | 10.02% (9.50%-10.53%)                 | 4 (1-10)                 | Unknown   | 0 (4)            | NA                                   | NA                       |
|                            | Unk                    | 5 (47)           | 10.64% (1.82%-19.45%)                 | 1 (1-7)                  |           |                  |                                      |                          |
| Stomach                    | 1 <sup>st</sup>        | 53 (1,066)       | 4.97% (3.67%-6.28%) <sup>*</sup>      | 2 (1-5) <sup>ns</sup>    | Metro     | 1,587 (28,792)   | 5.51% (5.25%-5.78%) <sup>ns</sup>    | 3 (1-9) <sup>ns</sup>    |
|                            | 2 <sup>nd</sup>        | 116 (2,275)      | 5.10% (4.19%-6.00%)                   | 3 (1-11)                 | Urban     | 140 (2,573)      | 5.44% (4.56%-6.32%)                  | 3 (1-7)                  |
|                            | 3 <sup>rd</sup>        | 274 (5,373)      | 5.10% (4.51%-5.69%)                   | 4 (1-9)                  | Rural     | 29 (459)         | 6.32% (4.09%-8.54%)                  | 3 (1-6)                  |
|                            | 4 <sup>th</sup>        | 1,301 (23,007)   | 5.65% (5.36%-5.95%)                   | 3 (1-9)                  | Unknown   | 0 (1)            | NA                                   | NA                       |
|                            | Unk                    | 12 (104)         | 11.54% (5.40%-17.68%)                 | 3.5 (1-7.5)              |           |                  |                                      |                          |
| Liver <sup>d</sup>         | 1 <sup>st</sup>        | 78 (871)         | 8.96% (7.06%-10.85%) <sup>ns</sup>    | 2 (0-7) <sup>ns</sup>    | Metro     | 2,017 (23,732)   | 8.50% (8.14%-8.85%) <sup>ns</sup>    | 2 (1-6) <sup>ns</sup>    |
|                            | 2 <sup>nd</sup>        | 183 (2,076)      | 8.82% (7.60%-10.03%)                  | 2 (0-6)                  | Urban     | 202 (2,227)      | 9.07% (7.88%-10.26%)                 | 1 (0-5)                  |
|                            | 3 <sup>rd</sup>        | 418 (4,814)      | 8.68% (7.89%-9.48%)                   | 2 (0-5)                  | Rural     | 26 (306)         | 8.50% (5.37%-11.62%)                 | 3.5 (1-11)               |
|                            | 4 <sup>th</sup>        | 1,560 (18,464)   | 8.45% (8.05%-8.85%)                   | 2 (1-6)                  | Unknown   | 0 (2)            | NA                                   | NA                       |
|                            | Unk                    | 6 (42)           | 14.29% (3.70%-24.87%)                 | 1.5 (0-5)                |           |                  |                                      |                          |
| Extrahepatic biliary tract | 1 <sup>st</sup>        | 21 (441)         | 4.76% (2.77%-6.75%) <sup>ns</sup>     | 2.5 (2-5) <sup>ns</sup>  | Metro     | 807 (12,834)     | 6.29% (5.87%-6.71%) <sup>ns</sup>    | 3 (1-8) <sup>ns</sup>    |
|                            | 2 <sup>nd</sup>        | 56 (1,077)       | 5.20% (3.87%-6.53%)                   | 4 (1-10)                 | Urban     | 61 (1,214)       | 5.02% (3.80%-6.25%)                  | 4 (1-7)                  |
|                            | 3 <sup>rd</sup>        | 136 (2,443)      | 5.57% (4.66%-6.48%)                   | 3 (1-9)                  | Rural     | 8 (190)          | 4.21% (1.35%-7.07%)                  | 2.5 (0-7)                |
|                            | 4 <sup>th</sup>        | 660 (10,257)     | 6.43% (5.96%-6.91%)                   | 3 (1-8)                  | Unknown   | 0 (0)            |                                      | NA                       |
|                            | Unk                    | 3 (20)           | NA                                    | 1 (0-9)                  |           |                  |                                      |                          |
| Pancreas                   | 1 <sup>st</sup>        | 173 (1,744)      | 9.92% (8.52%-11.32%) <sup>*</sup>     | 2 (1-6) <sup>***</sup>   | Metro     | 5,093 (46,910)   | 10.86% (10.58%-11.14%) <sup>ns</sup> | 3 (1-8) <sup>ns</sup>    |
|                            | 2 <sup>nd</sup>        | 470 (4,034)      | 11.65% (10.66%-12.64%)                | 2 (1-6)                  | Urban     | 506 (4,788)      | 10.57% (9.70%-11.44%)                | 2 (1-7)                  |
|                            | 3 <sup>rd</sup>        | 1,051 (9,572)    | 10.98% (10.35%-11.61%)                | 2 (1-7)                  | Rural     | 83 (742)         | 11.19% (8.92%-13.45%)                | 3 (1-6)                  |
|                            | 4 <sup>th</sup>        | 3,977 (37,041)   | 10.74% (10.42%-11.05%)                | 3 (1-8)                  | Unknown   | 0 (2)            | NA                                   | NA                       |
|                            | Unk                    | 11 (51)          | 21.57% (10.28%-32.86%)                | 2 (0-5)                  |           |                  |                                      |                          |
| Small intestine            | 1 <sup>st</sup>        | 8 (380)          | 2.11% (0.66%-3.55%) <sup>ns</sup>     | 8 (1-NA) <sup>ns</sup>   | Metro     | 218 (8,471)      | 2.57% (2.24%-2.91%) <sup>ns</sup>    | 8 (2-21) <sup>ns</sup>   |
|                            | 2 <sup>nd</sup>        | 18 (796)         | 2.26% (1.23%-3.29%)                   | 11 (6-44)                | Urban     | 20 (1,038)       | 1.93% (1.09%-2.76%)                  | 8 (1.5-21)               |
|                            | 3 <sup>rd</sup>        | 34 (1,806)       | 1.88% (1.26%-2.51%)                   | 4 (1-11)                 | Rural     | 1 (119)          | NA                                   | NA (NA-NA)               |
|                            | 4 <sup>th</sup>        | 179 (6,642)      | 2.69% (2.31%-3.08%)                   | 8 (2-26)                 | Unknown   | 0 (0)            |                                      | NA                       |
|                            | Unk                    | 0 (4)            | NA                                    | NA                       |           |                  |                                      |                          |
| Colon & rectum             | 1 <sup>st</sup>        | 434 (8,354)      | 5.20% (4.72%-5.67%) <sup>*</sup>      | 10 (3-23) <sup>*</sup>   | Metro     | 8,436 (162,938)  | 5.18% (5.07%-5.29%) <sup>ns</sup>    | 11 (3-25) <sup>ns</sup>  |
|                            | 2 <sup>nd</sup>        | 765 (15,873)     | 4.82% (4.49%-5.15%)                   | 10 (2-25)                | Urban     | 1,013 (20,201)   | 5.01% (4.71%-5.32%)                  | 11 (3-25)                |
|                            | 3 <sup>rd</sup>        | 1,891 (35,129)   | 5.38% (5.15%-5.62%)                   | 11 (3-25)                | Rural     | 196 (3,390)      | 5.78% (5.00%-6.57%)                  | 11 (4-21)                |
|                            | 4 <sup>th</sup>        | 6,525 (126,762)  | 5.15% (5.03%-5.27%)                   | 12 (3-25)                | Unknown   | 0 (10)           | NA                                   | NA                       |
|                            | Unk                    | 30 (421)         | 7.13% (4.67%-9.58%)                   | 7 (4-17)                 |           |                  |                                      |                          |
| Right colon                | 1 <sup>st</sup>        | 136 (3,167)      | 4.29% (3.59%-5.00%) <sup>ns</sup>     | 6 (2-19) <sup>ns</sup>   | Metro     | 2,410 (62,941)   | 3.83% (3.68%-3.98%) <sup>ns</sup>    | 8 (2-20) <sup>ns</sup>   |
|                            | 2 <sup>nd</sup>        | 230 (6,144)      | 3.74% (3.27%-4.22%)                   | 7 (2-20)                 | Urban     | 302 (8,104)      | 3.73% (3.31%-4.14%)                  | 8 (2-21)                 |
|                            | 3 <sup>rd</sup>        | 531 (13,916)     | 3.82% (3.50%-4.13%)                   | 8 (2-19)                 | Rural     | 65 (1,336)       | 4.87% (3.71%-6.02%)                  | 8 (3-23)                 |
|                            | 4 <sup>th</sup>        | 1,872 (49,010)   | 3.82% (3.65%-3.99%)                   | 9 (2-21)                 | Unknown   | 0 (2)            | NA                                   | NA                       |
|                            | Unk                    | 8 (146)          | 5.48% (1.79%-9.17%)                   | 13 (5.5-24)              |           |                  |                                      |                          |
| Left colon                 | 1 <sup>st</sup>        | 150 (2,924)      | 5.13% (4.33%-5.93%) <sup>ns</sup>     | 12 (4-23) <sup>***</sup> | Metro     | 2,953 (56,143)   | 5.26% (5.08%-5.44%) <sup>ns</sup>    | 13 (3-29) <sup>ns</sup>  |
|                            | 2 <sup>nd</sup>        | 264 (5,394)      | 4.89% (4.32%-5.47%)                   | 12 (3-26)                | Urban     | 350 (6,727)      | 5.20% (4.67%-5.73%)                  | 14 (4-26)                |
|                            | 3 <sup>rd</sup>        | 656 (11,727)     | 5.59% (5.18%-6.01%)                   | 13 (3-27)                | Rural     | 67 (1,139)       | 5.88% (4.52%-7.25%)                  | 14 (4-21)                |
|                            | 4 <sup>th</sup>        | 2,289 (43,800)   | 5.23% (5.02%-5.43%)                   | 14 (4-29)                | Unknown   | 0 (5)            | NA                                   | NA                       |
|                            | Unk                    | 11 (169)         | 6.51% (2.79%-10.23%)                  | 5 (2-11)                 |           |                  |                                      |                          |
| Unspecified colon          | 1 <sup>st</sup>        | 28 (221)         | 12.67% (8.28%-17.06%) <sup>ns</sup>   | 3 (0.5-11) <sup>ns</sup> | Metro     | 667 (4,152)      | 16.06% (14.95%-17.18%) <sup>ns</sup> | 3 (1-12) <sup>ns</sup>   |
|                            | 2 <sup>nd</sup>        | 53 (377)         | 14.06% (10.55%-17.57%)                | 2 (1-9)                  | Urban     | 69 (499)         | 13.83% (10.80%-16.86%)               | 3 (1-14)                 |
|                            | 3 <sup>rd</sup>        | 158 (925)        | 17.08% (14.66%-19.51%)                | 4 (1-11)                 | Rural     | 10 (75)          | 13.33% (5.64%-21.03%)                | 8 (2-13)                 |

|                   |                 |                |                                     |                          |         |                 |                                      |                          |
|-------------------|-----------------|----------------|-------------------------------------|--------------------------|---------|-----------------|--------------------------------------|--------------------------|
|                   | 4 <sup>th</sup> | 507 (3,200)    | 15.84% (14.58%-17.11%)              | 4 (1-13)                 | Unknown | 0 (1)           | NA                                   | NA                       |
|                   | Unk             | 0 (4)          | NA                                  | NA                       |         |                 |                                      |                          |
| Rectum            | 1 <sup>st</sup> | 120 (2,042)    | 5.88% (4.86%-6.90%) <sup>ns</sup>   | 12 (5-29) <sup>ns</sup>  | Metro   | 2,406 (39,702)  | 6.06% (5.83%-6.29%) <sup>ns</sup>    | 16 (5-30) *              |
|                   | 2 <sup>nd</sup> | 218 (3,958)    | 5.51% (4.80%-6.22%)                 | 16 (5-29)                | Urban   | 292 (4,871)     | 5.99% (5.33%-6.66%)                  | 13 (6-27)                |
|                   | 3 <sup>rd</sup> | 546 (8,561)    | 6.38% (5.86%-6.90%)                 | 15 (4-30)                | Rural   | 54 (840)        | 6.43% (4.77%-8.09%)                  | 11 (5-21)                |
|                   | 4 <sup>th</sup> | 1,857 (30,752) | 6.04% (5.77%-6.30%)                 | 16 (6-29)                | Unknown | 0 (2)           | NA                                   | NA                       |
|                   | Unk             | 11 (102)       | 10.78% (4.76%-16.80%)               | 11 (6-17)                |         |                 |                                      |                          |
| Anus              | 1 <sup>st</sup> | 7 (332)        | 2.11% (0.56%-3.65%) *               | 16 (10-16) <sup>ns</sup> | Metro   | 161 (8,318)     | 1.94% (1.64%-2.23%) <sup>ns</sup>    | 12 (5-23) <sup>ns</sup>  |
|                   | 2 <sup>nd</sup> | 18 (771)       | 2.33% (1.27%-3.40%)                 | 8 (5-35)                 | Urban   | 18 (946)        | 1.90% (1.03%-2.77%)                  | 7 (4-13)                 |
|                   | 3 <sup>rd</sup> | 20 (1,695)     | 1.18% (0.67%-1.69%)                 | 12 (6-16)                | Rural   | 4 (139)         | NA                                   | 13 (8-16)                |
|                   | 4 <sup>th</sup> | 137 (6,598)    | 2.08% (1.73%-2.42%)                 | 11 (5-23)                | Unknown | 0 (2)           | NA                                   | NA                       |
|                   | Unk             | 1 (9)          | NA                                  | 6 (6-6)                  |         |                 |                                      |                          |
| Other GI          | 1 <sup>st</sup> | 14 (272)       | 5.15% (2.52%-7.77%) <sup>ns</sup>   | 1 (0-2) <sup>ns</sup>    | Metro   | 633 (7,727)     | 8.19% (7.58%-8.80%) <sup>***</sup>   | 2 (0-7) <sup>ns</sup>    |
|                   | 2 <sup>nd</sup> | 52 (593)       | 8.77% (6.49%-11.05%)                | 1 (0-3)                  | Urban   | 40 (782)        | 5.12% (3.57%-6.66%)                  | 2 (1-4)                  |
|                   | 3 <sup>rd</sup> | 124 (1,535)    | 8.08% (6.71%-9.44%)                 | 1 (0-7)                  | Rural   | 7 (102)         | 6.86% (1.96%-11.77%)                 | 2 (0-8)                  |
|                   | 4 <sup>th</sup> | 487 (6,196)    | 7.86% (7.19%-8.53%)                 | 2 (0-7)                  | Unknown | 0 (0)           |                                      | NA                       |
|                   | Unk             | 3 (15)         | NA                                  | 0 (0-2)                  |         |                 |                                      |                          |
| Kidney            | 1 <sup>st</sup> | 254 (3,073)    | 8.27% (7.29%-9.24%) *               | 7 (3-17) <sup>***</sup>  | Metro   | 5,023 (61,101)  | 8.22% (8.00%-8.44%) <sup>***</sup>   | 8 (2-23) <sup>***</sup>  |
|                   | 2 <sup>nd</sup> | 602 (6,399)    | 9.41% (8.69%-10.12%)                | 7 (2-18)                 | Urban   | 700 (7,370)     | 9.50% (8.83%-10.17%)                 | 7 (2-17)                 |
|                   | 3 <sup>rd</sup> | 1,146 (13,579) | 8.44% (7.97%-8.91%)                 | 7 (2-19)                 | Rural   | 100 (1,132)     | 8.83% (7.18%-10.49%)                 | 5 (2-14)                 |
|                   | 4 <sup>th</sup> | 3,811 (46,437) | 8.21% (7.96%-8.46%)                 | 8 (3-24)                 | Unknown | 0 (2)           | NA                                   | NA                       |
|                   | Unk             | 10 (117)       | 8.55% (3.48%-13.61%)                | 5.5 (1-12.5)             |         |                 |                                      |                          |
| Bladder           | 1 <sup>st</sup> | 66 (1,492)     | 4.42% (3.38%-5.47%) <sup>***</sup>  | 3 (1-9) <sup>ns</sup>    | Metro   | 1,064 (36,649)  | 2.90% (2.73%-3.08%) *                | 4 (1-11) <sup>ns</sup>   |
|                   | 2 <sup>nd</sup> | 103 (3,289)    | 3.13% (2.54%-3.73%)                 | 4 (2-9)                  | Urban   | 120 (4,385)     | 2.74% (2.25%-3.22%)                  | 4 (1-8)                  |
|                   | 3 <sup>rd</sup> | 226 (7,795)    | 2.90% (2.53%-3.27%)                 | 4 (2-11)                 | Rural   | 31 (633)        | 4.90% (3.22%-6.58%)                  | 4 (2-12)                 |
|                   | 4 <sup>th</sup> | 819 (29,062)   | 2.82% (2.63%-3.01%)                 | 4 (1-11)                 | Unknown | 0 (1)           | NA                                   | NA                       |
|                   | Unk             | 1 (30)         | NA                                  | 1 (1-1)                  |         |                 |                                      |                          |
| Prostate          | 1 <sup>st</sup> | 26 (10,548)    | 0.25% (0.15%-0.34%) <sup>***</sup>  | 26 (8-77) <sup>ns</sup>  | Metro   | 1,206 (276,260) | 0.44% (0.41%-0.46%) <sup>ns</sup>    | 22 (8-63) <sup>ns</sup>  |
|                   | 2 <sup>nd</sup> | 96 (22,368)    | 0.43% (0.34%-0.51%)                 | 21 (5-70)                | Urban   | 124 (29,598)    | 0.42% (0.35%-0.49%)                  | 19 (6-69)                |
|                   | 3 <sup>rd</sup> | 228 (59,305)   | 0.38% (0.33%-0.43%)                 | 18 (7-69)                | Rural   | 9 (3,998)       | 0.23% (0.08%-0.37%)                  | 9 (8-15)                 |
|                   | 4 <sup>th</sup> | 988 (217,524)  | 0.45% (0.43%-0.48%)                 | 23 (9-61)                | Unknown | 0 (62)          | NA                                   | NA                       |
|                   | Unk             | 1 (173)        | NA                                  | 8 (8-8)                  |         |                 |                                      |                          |
| Testis            | 1 <sup>st</sup> | 34 (396)       | 8.59% (5.83%-11.35%) <sup>***</sup> | NA (14-NA) <sup>ns</sup> | Metro   | 1,031 (14,482)  | 7.12% (6.70%-7.54%) <sup>ns</sup>    | NA (20-NA) <sup>ns</sup> |
|                   | 2 <sup>nd</sup> | 93 (1,146)     | 8.12% (6.53%-9.70%)                 | NA (16-NA)               | Urban   | 86 (1,234)      | 6.97% (5.55%-8.39%)                  | NA (14-NA)               |
|                   | 3 <sup>rd</sup> | 243 (2,715)    | 8.95% (7.88%-10.02%)                | NA (15-NA)               | Rural   | 12 (162)        | 7.41% (3.37%-11.44%)                 | NA (13-NA)               |
|                   | 4 <sup>th</sup> | 758 (11,592)   | 6.54% (6.09%-6.99%)                 | NA (25-NA)               | Unknown | 0 (3)           | NA                                   | NA                       |
|                   | Unk             |                |                                     | NA (NA-NA)               |         |                 |                                      |                          |
| Other GU          | 1 <sup>st</sup> | 15 (346)       | 4.34% (2.19%-6.48%) <sup>ns</sup>   | 7 (4-16) <sup>ns</sup>   | Metro   | 470 (7,647)     | 6.15% (5.61%-6.68%) <sup>ns</sup>    | 5 (2-12) <sup>ns</sup>   |
|                   | 2 <sup>nd</sup> | 43 (726)       | 5.92% (4.21%-7.64%)                 | 6 (2-11)                 | Urban   | 49 (933)        | 5.25% (3.82%-6.68%)                  | 5 (2-11)                 |
|                   | 3 <sup>rd</sup> | 100 (1,631)    | 6.13% (4.97%-7.30%)                 | 6 (2-11)                 | Rural   | 10 (137)        | 7.30% (2.94%-11.66%)                 | 4.5 (2-11)               |
|                   | 4 <sup>th</sup> | 369 (6,006)    | 6.14% (5.54%-6.75%)                 | 5 (2-12)                 | Unknown | 0 (1)           | NA                                   | NA                       |
|                   | Unk             | 2 (9)          | NA                                  | 5.5 (4-7)                |         |                 |                                      |                          |
| Ovary             | 1 <sup>st</sup> | 42 (790)       | 5.32% (3.75%-6.88%) *               | 4 (1-20) <sup>***</sup>  | Metro   | 1,532 (26,912)  | 5.69% (5.42%-5.97%) <sup>ns</sup>    | 16 (2-36) <sup>ns</sup>  |
|                   | 2 <sup>nd</sup> | 134 (1,941)    | 6.90% (5.78%-8.03%)                 | 9 (2-27)                 | Urban   | 141 (2,542)     | 5.55% (4.66%-6.44%)                  | 11 (2-25)                |
|                   | 3 <sup>rd</sup> | 313 (5,135)    | 6.10% (5.44%-6.75%)                 | 15 (2-33)                | Rural   | 23 (333)        | 6.91% (4.18%-9.63%)                  | 11 (3-47)                |
|                   | 4 <sup>th</sup> | 1,207 (21,900) | 5.51% (5.21%-5.81%)                 | 18 (3-39)                | Unknown | 0 (2)           | NA                                   | NA                       |
|                   | Unk             | 0 (23)         | NA                                  | NA                       |         |                 |                                      |                          |
| Uterus            | 1 <sup>st</sup> | 47 (2,212)     | 2.12% (1.52%-2.73%) <sup>ns</sup>   | 8 (2-23) <sup>ns</sup>   | Metro   | 1,091 (65,544)  | 1.66% (1.57%-1.76%) <sup>ns</sup>    | 8 (2-21) <sup>ns</sup>   |
|                   | 2 <sup>nd</sup> | 89 (4,959)     | 1.79% (1.43%-2.16%)                 | 7 (1-19)                 | Urban   | 121 (6,791)     | 1.78% (1.47%-2.10%)                  | 7 (1-24)                 |
|                   | 3 <sup>rd</sup> | 237 (12,704)   | 1.87% (1.63%-2.10%)                 | 9 (2-23)                 | Rural   | 20 (1,002)      | 2.00% (1.13%-2.86%)                  | 16 (6-19)                |
|                   | 4 <sup>th</sup> | 858 (53,412)   | 1.61% (1.50%-1.71%)                 | 8 (2-22)                 | Unknown | 0 (5)           | NA                                   | NA                       |
|                   | Unk             |                |                                     | NA (NA-NA)               |         |                 |                                      |                          |
| Cervix            | 1 <sup>st</sup> | 1 (55)         | NA                                  | NA                       |         |                 |                                      |                          |
|                   | 1 <sup>st</sup> | 39 (823)       | 4.74% (3.29%-6.19%) <sup>ns</sup>   | 6 (2-20) <sup>ns</sup>   | Metro   | 747 (18,408)    | 4.06% (3.77%-4.34%) <sup>***</sup>   | 7 (3-16) <sup>ns</sup>   |
|                   | 2 <sup>nd</sup> | 76 (1,872)     | 4.06% (3.17%-4.95%)                 | 10 (4-20)                | Urban   | 76 (1,979)      | 3.84% (2.99%-4.69%)                  | 9 (4-24)                 |
|                   | 3 <sup>rd</sup> | 174 (3,973)    | 4.38% (3.74%-5.02%)                 | 6 (3-12)                 | Rural   | 21 (271)        | 7.75% (4.57%-10.93%)                 | 6 (2-12)                 |
|                   | 4 <sup>th</sup> | 553 (13,961)   | 3.96% (3.64%-4.28%)                 | 7 (2-18)                 | Unknown | 0 (0)           |                                      | NA                       |
| Other GYN         | 1 <sup>st</sup> | 2 (29)         | NA                                  | NA (NA-NA)               |         |                 |                                      |                          |
|                   | 1 <sup>st</sup> | 15 (460)       | 3.26% (1.64%-4.88%) <sup>ns</sup>   | 2 (0-5) <sup>ns</sup>    | Metro   | 402 (9,123)     | 4.41% (3.99%-4.83%) <sup>ns</sup>    | 5 (1-23) <sup>ns</sup>   |
|                   | 2 <sup>nd</sup> | 44 (856)       | 5.14% (3.66%-6.62%)                 | 7 (1-24)                 | Urban   | 52 (1,212)      | 4.29% (3.15%-5.43%)                  | 5 (1-17)                 |
|                   | 3 <sup>rd</sup> | 86 (2,008)     | 4.28% (3.40%-5.17%)                 | 4 (1-32)                 | Rural   | 3 (179)         | NA                                   | 5 (5-NA)                 |
|                   | 4 <sup>th</sup> | 311 (7,173)    | 4.34% (3.86%-4.81%)                 | 5 (1-23)                 | Unknown | 0 (0)           |                                      | NA                       |
| Bone tumor        | 1 <sup>st</sup> | 1 (17)         | NA                                  | 5 (5-5)                  |         |                 |                                      |                          |
|                   | 1 <sup>st</sup> | 20 (146)       | 13.70% (8.12%-19.28%) <sup>ns</sup> | 17 (9-50) <sup>ns</sup>  | Metro   | 536 (4,582)     | 11.70% (10.77%-12.63%) <sup>ns</sup> | 20 (8-NA) <sup>ns</sup>  |
|                   | 2 <sup>nd</sup> | 44 (344)       | 12.79% (9.26%-16.32%)               | 15 (4-32)                | Urban   | 67 (435)        | 15.40% (12.01%-18.79%)               | 15 (8-32)                |
|                   | 3 <sup>rd</sup> | 123 (933)      | 13.18% (11.01%-15.35%)              | 19 (8-NA)                | Rural   | 6 (62)          | 9.68% (2.32%-17.04%)                 | NA (14-NA)               |
|                   | 4 <sup>th</sup> | 421 (3,646)    | 11.55% (10.51%-12.58%)              | 20 (8-NA)                | Unknown | 0 (0)           |                                      | NA                       |
| STS               | 1 <sup>st</sup> | 1 (10)         | NA                                  | 9 (9-9)                  |         |                 |                                      |                          |
|                   | 1 <sup>st</sup> | 71 (731)       | 9.71% (7.57%-11.86%) <sup>ns</sup>  | 7 (2-17) <sup>ns</sup>   | Metro   | 1,958 (22,711)  | 8.62% (8.26%-8.99%) <sup>ns</sup>    | 8 (2-23) <sup>ns</sup>   |
|                   | 2 <sup>nd</sup> | 161 (1,777)    | 9.06% (7.73%-10.39%)                | 10 (4-22)                | Urban   | 195 (2,114)     | 9.22% (7.99%-10.46%)                 | 9 (3-24)                 |
|                   | 3 <sup>rd</sup> | 393 (4,342)    | 9.05% (8.20%-9.90%)                 | 7 (2-21)                 | Rural   | 28 (264)        | 10.61% (6.89%-14.32%)                | 6.5 (1-14)               |
|                   | 4 <sup>th</sup> | 1,556 (18,218) | 8.54% (8.14%-8.95%)                 | 8 (2-24)                 | Unknown | 0 (4)           | NA                                   | NA                       |
| Skin melanoma     | 1 <sup>st</sup> | 0 (25)         | NA                                  | NA                       |         |                 |                                      |                          |
|                   | 1 <sup>st</sup> | 32 (2,890)     | 1.11% (0.73%-1.49%) <sup>ns</sup>   | 11 (1-26) <sup>ns</sup>  | Metro   | 948 (95,565)    | 0.99% (0.93%-1.05%) <sup>ns</sup>    | 6 (2-20) <sup>ns</sup>   |
|                   | 2 <sup>nd</sup> | 80 (7,005)     | 1.14% (0.89%-1.39%)                 | 6 (3-14)                 | Urban   | 96 (10,243)     | 0.94% (0.75%-1.12%)                  | 5 (3-25)                 |
|                   | 3 <sup>rd</sup> | 194 (17,615)   | 1.10% (0.95%-1.26%)                 | 6 (2-13)                 | Rural   | 21 (1,462)      | 1.44% (0.83%-2.05%)                  | 10 (4-20)                |
|                   | 4 <sup>th</sup> | 759 (79,739)   | 0.95% (0.88%-1.02%)                 | 6 (2-22)                 | Unknown | 0 (17)          | NA                                   | NA                       |
| Non-skin melanoma | 1 <sup>st</sup> | 0 (38)         | NA                                  | NA                       |         |                 |                                      |                          |
|                   | 1 <sup>st</sup> | 2 (110)        | NA <sup>ns</sup>                    | 19.5 (1-38) *            | Metro   | 95 (2,707)      | 3.51% (2.82%-4.20%) <sup>ns</sup>    | 6 (3-13) <sup>ns</sup>   |
|                   | 2 <sup>nd</sup> | 10 (273)       | 3.66% (1.43%-5.89%)                 | 10 (4-18)                | Urban   | 11 (334)        | 3.29% (1.38%-5.21%)                  | 7 (3-18)                 |
|                   | 3 <sup>rd</sup> | 20 (539)       | 3.71% (2.11%-5.31%)                 | 4 (2-5)                  | Rural   | 0 (42)          | NA                                   | NA                       |
|                   | 4 <sup>th</sup> | 74 (2,158)     | 3.43% (2.66%-4.20%)                 | 6 (3-15)                 | Unknown | 0 (1)           | NA                                   | NA                       |

|                  |                 |                |                                    |                          |         |                |                                   |                          |
|------------------|-----------------|----------------|------------------------------------|--------------------------|---------|----------------|-----------------------------------|--------------------------|
| Skin cancer      | Unk             | 0 (4)          | NA                                 | NA                       |         |                |                                   |                          |
|                  | 1 <sup>st</sup> | 0 (180)        | NA <sup>ns</sup>                   | NA <sup>ns</sup>         | Metro   | 33 (4,775)     | 0.69% (0.46%-0.93%) <sup>ns</sup> | 9 (5-17) <sup>ns</sup>   |
|                  | 2 <sup>nd</sup> | 4 (378)        | NA                                 | 9 (7-18.5)               | Urban   | 4 (500)        | NA                                | 16 (6.5-26)              |
|                  | 3 <sup>rd</sup> | 9 (968)        | 0.93% (0.33%-1.53%)                | 11 (8-21)                | Rural   | 0 (70)         | NA                                | NA                       |
|                  | 4 <sup>th</sup> | 24 (3,815)     | 0.63% (0.38%-0.88%)                | 8 (5-18)                 | Unknown | 0 (0)          | NA                                | NA                       |
| Embryonal tumors | Unk             | 0 (4)          | NA                                 | NA                       |         |                |                                   |                          |
|                  | 1 <sup>st</sup> | 10 (136)       | 7.35% (2.97%-11.74%) <sup>ns</sup> | 57 (16-NA) <sup>ns</sup> | Metro   | 305 (3,906)    | 7.81% (6.97%-8.65%) <sup>ns</sup> | NA (26-NA) <sup>ns</sup> |
|                  | 2 <sup>nd</sup> | 25 (303)       | 8.25% (5.15%-11.35%)               | NA (23-NA)               | Urban   | 24 (317)       | 7.57% (4.66%-10.48%)              | 32 (12-NA)               |
|                  | 3 <sup>rd</sup> | 64 (793)       | 8.07% (6.17%-9.97%)                | NA (9-NA)                | Rural   | 5 (57)         | 8.77% (1.43%-16.12%)              | NA (9-NA)                |
|                  | 4 <sup>th</sup> | 234 (3,036)    | 7.71% (6.76%-8.66%)                | NA (26-NA)               | Unknown | 0 (1)          | NA                                | NA                       |
| All other        | Unk             | 1 (13)         | NA                                 | NA (NA-NA)               |         |                |                                   |                          |
|                  | 1 <sup>st</sup> | 91 (1,104)     | 8.24% (6.62%-9.87%) <sup>ns</sup>  | 2 (1-6) <sup>***</sup>   | Metro   | 2,600 (29,664) | 8.76% (8.44%-9.09%) <sup>ns</sup> | 5 (1-21) <sup>***</sup>  |
|                  | 2 <sup>nd</sup> | 217 (2,462)    | 8.81% (7.69%-9.93%)                | 4 (1-15)                 | Urban   | 254 (2,965)    | 8.57% (7.56%-9.57%)               | 4 (1-11)                 |
|                  | 3 <sup>rd</sup> | 516 (5,787)    | 8.92% (8.18%-9.65%)                | 5 (1-16)                 | Rural   | 48 (435)       | 11.03% (8.09%-13.98%)             | 2 (0-5)                  |
|                  | 4 <sup>th</sup> | 2,073 (23,679) | 8.75% (8.39%-9.11%)                | 5 (1-21)                 | Unknown | 1 (4)          | NA                                | 73 (73-73)               |
|                  | Unk             | 6 (36)         | 16.67% (4.49%-28.84%)              | 0.5 (0-13)               |         |                |                                   |                          |

<sup>a</sup> The county-level education is presented as quantiles here.

<sup>b</sup> Prevalence was only calculated in category with more than 5 sLM cases.

<sup>c</sup> Survival data (in months) are shown as the median survival and interquartile range in cases with synchronous lung metastasis at diagnosis.

<sup>d</sup> Liver cancer here includes hepatocellular carcinoma and intrahepatic cholangiocarcinoma.

Abbreviations: sLM: synchronous lung metastasis; Unk: unknown; GI: gastrointestinal cancer; GU: genitourinary cancer; GYN: gynecologic cancer; NA: non-applicable; ns: non-significant; \*: p<0.05; \*\*\*: p<0.001 for intragroup survival comparison by Chi-square tests or log-rank tests.



**Supplementary Table S4.** Number of cases with synchronous lung metastasis and all cases, prevalence of synchronous lung metastasis and median survival with interquartile range by cancer type and T stage or N stage.

| Categories                 | T stage | No. of sLM (All) | Prevalence <sup>a</sup>    | Survival <sup>b</sup>    | N stage | No. of sLM (All) | Prevalence <sup>a</sup>            | Survival <sup>b</sup>    |
|----------------------------|---------|------------------|----------------------------|--------------------------|---------|------------------|------------------------------------|--------------------------|
| Head and neck              | T1      | 117 (22,860)     | 0.51% (0.42%-0.60%)<br>--- | 12 (4-29) <sup>---</sup> | N0      | 250 (35,500)     | 0.70% (0.62%-0.79%) <sup>---</sup> | 11 (4-30) <sup>---</sup> |
|                            | T2      | 272 (18,927)     | 1.44% (1.27%-1.61%)        | 10 (4-23)                | N1      | 278 (10,255)     | 2.71% (2.40%-3.03%)                | 8 (3-18)                 |
|                            | T3      | 357 (11,672)     | 3.06% (2.75%-3.37%)        | 10 (4-23)                | N2      | 779 (23,828)     | 3.27% (3.04%-3.50%)                | 9 (4-20)                 |
|                            | T4      | 571 (13,187)     | 4.33% (3.98%-4.68%)        | 7 (3-16)                 | N3      | 165 (2,337)      | 7.06% (6.02%-8.10%)                | 8 (3-22)                 |
|                            | Unk     | 257 (8,251)      | 3.11% (2.74%-3.49%)        | 7 (3-20)                 | Unk     | 102 (2,977)      | 3.43% (2.77%-4.08%)                | 5 (1-15)                 |
| Thyroid                    | T1      | 46 (44,173)      | 0.10% (0.07%-0.13%)<br>--- | NA (22-NA)<br>---        | N0      | 269 (57,001)     | 0.47% (0.42%-0.53%) <sup>---</sup> | 23 (3-83) <sup>---</sup> |
|                            | T2      | 52 (12,970)      | 0.40% (0.29%-0.51%)        | NA (15-NA)               | N1      | 625 (18,770)     | 3.33% (3.07%-3.59%)                | 10 (2-NA)                |
|                            | T3      | 211 (15,954)     | 1.32% (1.15%-1.50%)        | 83 (43-NA)               | N2      | 0 (0)            | NA                                 | NA                       |
|                            | T4      | 569 (3,012)      | 18.89% (17.49%-20.29%)     | 4 (1-22)                 | N3      | 0 (0)            | NA                                 | NA                       |
|                            | Unk     | 118 (1,894)      | 6.23% (5.14%-7.32%)        | 6 (1-21)                 | Unk     | 102 (2,232)      | 4.57% (3.70%-5.44%)                | 4 (1-15)                 |
| Breast                     | T1      | 434 (204,207)    | 0.21% (0.19%-0.23%)<br>--- | 26 (7-65) <sup>---</sup> | N0      | 1,155 (239,387)  | 0.48% (0.45%-0.51%) <sup>---</sup> | 18 (3-50) <sup>---</sup> |
|                            | T2      | 1,383 (107,635)  | 1.28% (1.22%-1.35%)        | 25 (7-52)                | N1      | 2,724 (84,290)   | 3.23% (3.11%-3.35%)                | 21 (6-47)                |
|                            | T3      | 874 (22,366)     | 3.91% (3.65%-4.16%)        | 19 (6-49)                | N2      | 656 (18,768)     | 3.50% (3.23%-3.76%)                | 25 (9-55)                |
|                            | T4      | 2,446 (15,366)   | 15.92% (15.34%-16.50%)     | 18 (5-45)                | N3      | 813 (11,774)     | 6.91% (6.45%-7.36%)                | 20 (7-47)                |
|                            | Unk     | 835 (9,075)      | 9.20% (8.61%-9.80%)        | 14 (1-38)                | Unk     | 624 (4,430)      | 14.09% (13.06%-15.11%)             | 10 (1-34)                |
| Main bronchus              | T1      | 18 (413)         | 4.36% (2.39%-6.33%)<br>--- | 10 (3-18) <sup>ns</sup>  | N0      | 217 (2,190)      | 9.91% (8.66%-11.16%)<br>---        | 4 (1-12) <sup>ns</sup>   |
|                            | T2      | 251 (2,972)      | 8.45% (7.45%-9.45%)        | 4 (1-12)                 | N1      | 83 (735)         | 11.29% (9.00%-13.58%)              | 5 (1-12)                 |
|                            | T3      | 427 (2,133)      | 20.02% (18.32%-21.72%)     | 4 (1-11)                 | N2      | 920 (5,334)      | 17.25% (16.23%-18.26%)             | 3 (1-9)                  |
|                            | T4      | 1,074 (4,470)    | 24.03% (22.77%-25.28%)     | 3 (1-10)                 | N3      | 543 (2,122)      | 25.59% (23.73%-27.45%)             | 4 (1-11)                 |
|                            | Unk     | 83 (890)         | 9.33% (7.42%-11.24%)       | 2 (1-9)                  | Unk     | 90 (497)         | 18.11% (14.72%-21.49%)             | 2 (1-9)                  |
| Oesophagus                 | T1      | 385 (4,893)      | 7.87% (7.11%-8.62%)<br>--- | 3 (1-9) <sup>---</sup>   | N0      | 438 (7,807)      | 5.61% (5.10%-6.12%) <sup>---</sup> | 3 (1-9) <sup>ns</sup>    |
|                            | T2      | 54 (1,896)       | 2.85% (2.10%-3.60%)        | 8 (3-20)                 | N1      | 1,003 (7,966)    | 12.59% (11.86%-13.32%)             | 4 (1-10)                 |
|                            | T3      | 269 (6,564)      | 4.10% (3.62%-4.58%)        | 6 (3-12)                 | N2      | 136 (2,030)      | 6.70% (5.61%-7.79%)                | 5 (2-9)                  |
|                            | T4      | 405 (2,293)      | 17.66% (16.10%-19.22%)     | 4 (1-8)                  | N3      | 127 (784)        | 16.20% (13.62%-18.78%)             | 3 (1-10)                 |
|                            | Unk     | 863 (4,422)      | 19.52% (18.35%-20.68%)     | 3 (1-9)                  | Unk     | 272 (1,481)      | 18.37% (16.39%-20.34%)             | 3 (1-8)                  |
| Stomach                    | T1      | 314 (7,798)      | 4.03% (3.59%-4.46%)<br>--- | 3 (1-9) <sup>---</sup>   | N0      | 553 (14,936)     | 3.70% (3.40%-4.01%) <sup>---</sup> | 3 (1-10) <sup>---</sup>  |
|                            | T2      | 64 (2,994)       | 2.14% (1.62%-2.66%)        | 4 (1-13)                 | N1      | 687 (8,194)      | 8.38% (7.78%-8.98%)                | 4 (1-10)                 |
|                            | T3      | 189 (7,506)      | 2.52% (2.16%-2.87%)        | 5 (2-11)                 | N2      | 71 (2,834)       | 2.51% (1.93%-3.08%)                | 4 (1-12)                 |
|                            | T4      | 307 (5,568)      | 5.51% (4.91%-6.11%)        | 3 (1-7)                  | N3      | 90 (2,786)       | 3.23% (2.57%-3.89%)                | 3 (1-8)                  |
|                            | Unk     | 882 (7,959)      | 11.08% (10.39%-11.77%)     | 3 (1-9)                  | Unk     | 355 (3,075)      | 11.54% (10.42%-12.67%)             | 2 (1-7)                  |
| Liver <sup>c</sup>         | T1      | 366 (9,114)      | 4.02% (3.61%-4.42%)<br>--- | 2 (1-9) <sup>---</sup>   | N0      | 1,023 (18,776)   | 5.45% (5.12%-5.77%) <sup>---</sup> | 2 (1-6) <sup>---</sup>   |
|                            | T2      | 339 (5,456)      | 6.21% (5.57%-6.85%)        | 3 (1-8)                  | N1      | 503 (2,778)      | 18.11% (16.67%-19.54%)             | 3 (1-7)                  |
|                            | T3      | 540 (5,282)      | 10.22% (9.41%-11.04%)      | 2 (1-6)                  | N2      | 0 (0)            | NA                                 | NA                       |
|                            | T4      | 187 (1,045)      | 17.89% (15.57%-20.22%)     | 2 (0-5)                  | N3      | 0 (0)            | NA                                 | NA                       |
|                            | Unk     | 813 (5,370)      | 15.14% (14.18%-16.10%)     | 2 (0-5)                  | Unk     | 719 (4,713)      | 15.26% (14.23%-16.28%)             | 2 (0-5)                  |
| Extrahepatic biliary tract | T1      | 86 (2,257)       | 3.81% (3.02%-4.60%)<br>--- | 4 (2-8) <sup>---</sup>   | N0      | 250 (7,479)      | 3.34% (2.94%-3.75%) <sup>---</sup> | 3 (1-8) <sup>---</sup>   |
|                            | T2      | 52 (3,278)       | 1.59% (1.16%-2.01%)        | 4 (1-9)                  | N1      | 209 (3,948)      | 5.29% (4.60%-5.99%)                | 4 (1-11)                 |
|                            | T3      | 176 (3,891)      | 4.52% (3.87%-5.18%)        | 4 (1-11)                 | N2      | 62 (522)         | 11.88% (9.10%-14.65%)              | 3 (1-8)                  |
|                            | T4      | 66 (1,401)       | 4.71% (3.60%-5.82%)        | 4 (1-11)                 | N3      | 0 (0)            | NA                                 | NA                       |
|                            | Unk     | 496 (3,411)      | 14.54% (13.36%-15.72%)     | 2 (1-7)                  | Unk     | 355 (2,289)      | 15.51% (14.03%-16.99%)             | 2 (1-6)                  |
| Pancreas                   | T1      | 138 (2,811)      | 4.91% (4.11%-5.71%)<br>--- | 3 (1-10) <sup>---</sup>  | N0      | 2,343 (27,839)   | 8.42% (8.09%-8.74%) <sup>---</sup> | 3 (1-8) <sup>---</sup>   |
|                            | T2      | 1,394 (11,490)   | 12.13% (11.54%-12.73%)     | 3 (1-7)                  | N1      | 2,297 (19,150)   | 11.99% (11.53%-12.45%)             | 3 (1-8)                  |
|                            | T3      | 1,425 (20,240)   | 7.04% (6.69%-7.39%)        | 3 (1-9)                  | N2      | 0 (0)            | NA                                 | NA                       |
|                            | T4      | 1,219 (9,886)    | 12.33% (11.68%-12.98%)     | 4 (1-10)                 | N3      | 0 (0)            | NA                                 | NA                       |
|                            | Unk     | 1,506 (8,015)    | 18.79% (17.93%-19.64%)     | 2 (1-5)                  | Unk     | 1,042 (5,453)    | 19.11% (18.07%-20.15%)             | 2 (1-5)                  |
| Small intestine            | T1      | 28 (1,595)       | 1.76% (1.11%-2.40%)<br>--- | 6 (2-11) <sup>---</sup>  | N0      | 93 (4,591)       | 2.03% (1.62%-2.43%) <sup>---</sup> | 7 (2-17) <sup>+</sup>    |
|                            | T2      | 3 (1,277)        | NA                         | 12.5 (11-NA)             | N1      | 87 (4,064)       | 2.14% (1.70%-2.59%)                | 10 (2-43)                |
|                            | T3      | 39 (2,870)       | 1.36% (0.94%-1.78%)        | 19 (8-NA)                | N2      | 21 (429)         | 4.90% (2.85%-6.94%)                | 6 (1-9)                  |
|                            | T4      | 63 (2,363)       | 2.67% (2.02%-3.32%)        | 6 (1-17)                 | N3      | 0 (0)            | NA                                 | NA                       |
|                            | Unk     | 106 (1,523)      | 6.96% (5.68%-8.24%)        | 7 (1-14)                 | Unk     | 38 (544)         | 6.99% (4.84%-9.13%)                | 10 (1-35)                |

|                   |     |                |                            |                |     |                 |                            |                |
|-------------------|-----|----------------|----------------------------|----------------|-----|-----------------|----------------------------|----------------|
| Colon & rectum    | T1  | 1,047 (34,737) | 3.01% (2.83%-3.19%)<br>*** | 9 (2-23) ***   | N0  | 3,235 (106,169) | 3.05% (2.94%-3.15%) ***    | 10 (2-24) ***  |
|                   | T2  | 175 (22,176)   | 0.79% (0.67%-0.91%)        | 19 (5-36)      | N1  | 3,236 (48,113)  | 6.73% (6.50%-6.95%) ***    | 14 (4-28) ***  |
|                   | T3  | 2,563 (83,101) | 3.08% (2.97%-3.20%)        | 19 (7-37)      | N2  | 1,586 (24,699)  | 6.42% (6.12%-6.73%)        | 14 (5-29)      |
|                   | T4  | 2,122 (28,487) | 7.45% (7.14%-7.75%)        | 11 (4-25)      | N3  | 0 (0)           | NA                         | NA             |
|                   | Unk | 3,738 (18,038) | 20.72% (20.13%-21.31%)     | 7 (2-18)       | Unk | 1,588 (7,558)   | 21.01% (20.09%-21.93%)     | 7 (2-18)       |
| Right colon       | T1  | 314 (9,673)    | 3.25% (2.89%-3.60%)<br>*** | 6 (1-16) ***   | N0  | 789 (41,238)    | 1.91% (1.78%-2.05%) ***    | 7 (2-19) ***   |
|                   | T2  | 31 (9,563)     | 0.32% (0.21%-0.44%)        | 6 (3-28)       | N1  | 955 (17,935)    | 5.32% (5.00%-5.65%)        | 9 (2-22)       |
|                   | T3  | 742 (35,435)   | 2.09% (1.94%-2.24%)        | 15 (5-30)      | N2  | 672 (11,433)    | 5.88% (5.45%-6.31%)        | 11 (3-24)      |
|                   | T4  | 730 (13,174)   | 5.54% (5.15%-5.93%)        | 9 (3-20)       | N3  | 0 (0)           | NA                         | NA             |
|                   | Unk | 960 (4,538)    | 21.15% (19.97%-22.34%)     | 5 (1-14)       | Unk | 361 (1,777)     | 20.32% (18.44%-22.19%)     | 4 (1-12)       |
| Left colon        | T1  | 351 (13,064)   | 2.69% (2.41%-2.96%)<br>*** | 10 (2-23) ***  | N0  | 1,224 (36,095)  | 3.39% (3.20%-3.58%) ***    | 12 (3-26) ***  |
|                   | T2  | 49 (7,142)     | 0.69% (0.49%-0.88%)        | 23 (10-56)     | N1  | 1,048 (16,814)  | 6.23% (5.87%-6.60%)        | 16 (5-31)      |
|                   | T3  | 870 (27,881)   | 3.12% (2.92%-3.32%)        | 21 (8-40)      | N2  | 585 (8,820)     | 6.63% (6.11%-7.15%)        | 17 (7-33)      |
|                   | T4  | 861 (10,637)   | 8.09% (7.58%-8.61%)        | 14 (4-28)      | N3  | 0 (0)           | NA                         | NA             |
|                   | Unk | 1,239 (5,290)  | 23.42% (22.28%-24.56%)     | 9 (2-21)       | Unk | 513 (2,285)     | 22.45% (20.74%-24.16%)     | 7 (2-18)       |
| Unspecified colon | T1  | 33 (368)       | 8.97% (6.05%-11.89%) ***   | 2 (1-10) ***   | N0  | 274 (2,257)     | 12.14% (10.79%-13.49%) *** | 3 (1-10) **    |
|                   | T2  | 2 (196)        | NA                         | 2.5 (1-4)      | N1  | 137 (866)       | 15.82% (13.39%-18.25%)     | 4 (1-15)       |
|                   | T3  | 50 (1,208)     | 4.14% (3.02%-5.26%)        | 12 (5-28)      | N2  | 40 (550)        | 7.27% (5.10%-9.44%)        | 10 (3-20)      |
|                   | T4  | 85 (887)       | 9.58% (7.65%-11.52%)       | 7 (1-18)       | N3  | 0 (0)           | NA                         | NA             |
|                   | Unk | 576 (2,068)    | 27.85% (25.92%-29.79%)     | 3 (1-10)       | Unk | 295 (1,054)     | 27.99% (25.28%-30.70%)     | 3 (1-12)       |
| Rectum            | T1  | 349 (11,632)   | 3.00% (2.69%-3.31%)<br>*** | 14 (4-26) ***  | N0  | 948 (26,579)    | 3.57% (3.34%-3.79%) ***    | 14 (4-29) ***  |
|                   | T2  | 93 (5,275)     | 1.76% (1.41%-2.12%)        | 21 (7-36)      | N1  | 1,096 (12,498)  | 8.77% (8.27%-9.27%)        | 17 (7-31)      |
|                   | T3  | 901 (18,577)   | 4.85% (4.54%-5.16%)        | 21 (9-40)      | N2  | 289 (3,896)     | 7.42% (6.59%-8.24%)        | 19 (9-40)      |
|                   | T4  | 446 (3,789)    | 11.77% (10.74%-12.80%)     | 13 (5-28)      | N3  | 0 (0)           | NA                         | NA             |
|                   | Unk | 963 (6,142)    | 15.68% (14.77%-16.59%)     | 12 (3-24)      | Unk | 419 (2,442)     | 17.16% (15.66%-18.65%)     | 12 (3-22)      |
| Anus              | T1  | 6 (1,940)      | 0.31% (0.06%-0.56%)<br>*** | 23 (13-35) **  | N0  | 59 (6,054)      | 0.97% (0.73%-1.22%) ***    | 14 (7-29) **   |
|                   | T2  | 39 (3,380)     | 1.15% (0.79%-1.51%)        | 13 (6-36)      | N1  | 40 (933)        | 4.29% (2.99%-5.59%)        | 9 (3-21)       |
|                   | T3  | 45 (1,471)     | 3.06% (2.18%-3.94%)        | 10 (6-16)      | N2  | 33 (1,124)      | 2.94% (1.95%-3.92%)        | 11 (5-20)      |
|                   | T4  | 31 (789)       | 3.93% (2.57%-5.28%)        | 12 (5-21)      | N3  | 33 (843)        | 3.91% (2.61%-5.22%)        | 13 (6-NA)      |
|                   | Unk | 62 (1,825)     | 3.40% (2.57%-4.23%)        | 10 (4-20)      | Unk | 18 (451)        | 3.99% (2.18%-5.80%)        | 6 (4-14)       |
| Other GI          | T1  | 0 (2,114)      | NA***                      | NA ***         | N0  | 24 (4,690)      | 0.51% (0.31%-0.72%) ***    | 36 (8-NA) ***  |
|                   | T2  | 0 (459)        | NA                         | NA             | N1  | 14 (694)        | 2.02% (0.97%-3.06%)        | 5 (3-18)       |
|                   | T3  | 8 (1,347)      | 0.59% (0.18%-1.00%)        | 22 (7-36)      | N2  | 5 (330)         | 1.52% (0.20%-2.83%)        | 13 (12-22)     |
|                   | T4  | 29 (1,900)     | 1.53% (0.98%-2.08%)        | 14 (4-NA)      | N3  | 0 (0)           | NA                         | NA             |
|                   | Unk | 643 (2,791)    | 23.04% (21.48%-24.60%)     | 2 (0-6)        | Unk | 637 (2,897)     | 21.99% (20.48%-23.50%)     | 2 (0-5)        |
| Kidney            | T1  | 753 (44,005)   | 1.71% (1.59%-1.83%)<br>*** | 7 (2-22) ***   | N0  | 3,164 (62,789)  | 5.04% (4.87%-5.21%) ***    | 11 (3-30) ***  |
|                   | T2  | 1,064 (7,771)  | 13.69% (12.93%-14.46%)     | 8 (3-21)       | N1  | 1,938 (4,290)   | 45.17% (43.69%-46.66%)     | 5 (2-13)       |
|                   | T3  | 2,267 (13,592) | 16.68% (16.05%-17.31%)     | 12 (4-30)      | N2  | 0 (0)           | NA                         | NA             |
|                   | T4  | 810 (1,747)    | 46.37% (44.03%-48.70%)     | 5 (2-12)       | N3  | 0 (0)           | NA                         | NA             |
|                   | Unk | 929 (2,490)    | 37.31% (35.41%-39.21%)     | 4 (1-11)       | Unk | 721 (2,526)     | 28.54% (26.78%-30.30%)     | 4 (2-13)       |
| Bladder           | T1  | 192 (20,605)   | 0.93% (0.80%-1.06%)<br>*** | 5 (1-13) ***   | N0  | 641 (36,071)    | 1.78% (1.64%-1.91%) ***    | 4 (1-11) ***   |
|                   | T2  | 465 (12,643)   | 3.68% (3.35%-4.01%)        | 5 (2-11)       | N1  | 132 (1,568)     | 8.42% (7.04%-9.79%)        | 4 (1-10)       |
|                   | T3  | 110 (3,824)    | 2.88% (2.35%-3.41%)        | 5 (3-13)       | N2  | 199 (2,033)     | 9.79% (8.50%-11.08%)       | 5 (2-11)       |
|                   | T4  | 214 (2,874)    | 7.45% (6.49%-8.41%)        | 4 (2-11)       | N3  | 57 (538)        | 10.59% (7.99%-13.20%)      | 5 (2-12)       |
|                   | Unk | 234 (1,722)    | 13.59% (11.97%-15.21%)     | 2 (1-6)        | Unk | 186 (1,458)     | 12.76% (11.04%-14.47%)     | 3 (1-6)        |
| Prostate          | T1  | 259 (127,901)  | 0.20% (0.18%-0.23%)<br>*** | 30 (11-72) *** | N0  | 567 (287,587)   | 0.20% (0.18%-0.21%) ***    | 25 (9-63) **   |
|                   | T2  | 316 (133,949)  | 0.24% (0.21%-0.26%)        | 24 (10-65)     | N1  | 489 (11,121)    | 4.40% (4.02%-4.78%)        | 19 (8-53)      |
|                   | T3  | 136 (35,776)   | 0.38% (0.32%-0.44%)        | 26 (9-NA)      | N2  | 0 (0)           | NA                         | NA             |
|                   | T4  | 218 (3,431)    | 6.35% (5.54%-7.17%)        | 15 (5-37)      | N3  | 0 (0)           | NA                         | NA             |
|                   | Unk | 410 (8,861)    | 4.63% (4.19%-5.06%)        | 18 (7-47)      | Unk | 283 (11,210)    | 2.52% (2.23%-2.81%)        | 22 (7-NA)      |
| Testis            | T1  | 347 (9,864)    | 3.52% (3.15%-3.88%)<br>*** | NA (28-NA) *** | N0  | 359 (11,797)    | 3.04% (2.73%-3.35%) ***    | NA (23-NA) *** |
|                   | T2  | 343 (4,265)    | 8.04% (7.23%-8.86%)        | NA (62-NA)     | N1  | 315 (1,469)     | 21.44% (19.34%-23.54%)     | NA (16-NA)     |
|                   | T3  | 231 (739)      | 31.26% (27.92%-34.60%)     | NA (52-NA)     | N2  | 164 (1,003)     | 16.35% (14.06%-18.64%)     | NA (NA-NA)     |
|                   | T4  | 19 (90)        | 21.11% (12.68%-29.54%)     | NA (7-NA)      | N3  | 198 (851)       | 23.27% (20.43%-26.11%)     | NA (23-NA)     |
|                   | Unk | 189 (923)      | 20.48% (17.87%-23.08%)     | 23 (6-NA)      | Unk | 93 (761)        | 12.22% (9.89%-14.55%)      | 47 (8-NA)      |
| Other GU          | T1  | 66 (2,910)     | 2.27% (1.73%-2.81%)<br>*** | 5 (2-14) **    | N0  | 148 (6,161)     | 2.40% (2.02%-2.78%) ***    | 7 (3-14) **    |

|                  |     |                |                            |                |     |                |                              |                 |
|------------------|-----|----------------|----------------------------|----------------|-----|----------------|------------------------------|-----------------|
|                  | T2  | 24 (1,391)     | 1.73% (1.04%-2.41%)        | 6 (2-12)       | N1  | 108 (658)      | 16.41% (13.58%-19.24%)       | 5 (1-12)        |
|                  | T3  | 114 (2,402)    | 4.75% (3.90%-5.60%)        | 8 (2-14)       | N2  | 121 (762)      | 15.88% (13.28%-18.47%)       | 6 (2-11)        |
|                  | T4  | 121 (745)      | 16.24% (13.59%-18.89%)     | 5 (2-10)       | N3  | 14 (170)       | 8.24% (4.10%-12.37%)         | 7 (2-12)        |
|                  | Unk | 204 (1,270)    | 16.06% (14.04%-18.08%)     | 4 (1-11)       | Unk | 138 (967)      | 14.27% (12.07%-16.48%)       | 3 (1-10)        |
| Ovary            | T1  | 80 (8,707)     | 0.92% (0.72%-1.12%)<br>*** | 12 (1-43) ***  | N0  | 787 (20,924)   | 3.76% (3.50%-4.02%) ***      | 20 (4-42) ***   |
|                  | T2  | 158 (3,847)    | 4.11% (3.48%-4.73%)        | 13 (4-38)      | N1  | 522 (6,245)    | 8.36% (7.67%-9.05%)          | 18 (4-37)       |
|                  | T3  | 1,019 (15,205) | 6.70% (6.30%-7.10%)        | 21 (5-41)      | N2  | 0 (0)          | NA                           | NA              |
|                  | T4  | NA ()          | #VALUE!                    | NA             | N3  | 0 (0)          | NA                           | NA              |
| Uterus           | Unk | 439 (2,030)    | 21.63% (19.83%-23.42%)     | 4 (1-21)       | Unk | 387 (2,620)    | 14.77% (13.41%-16.13%)       | 5 (1-21)        |
|                  | T1  | 185 (58,868)   | 0.31% (0.27%-0.36%)<br>*** | 10 (3-27) ***  | N0  | 479 (64,137)   | 0.75% (0.68%-0.81%) ***      | 11 (3-30) ***   |
|                  | T2  | 90 (4,585)     | 1.96% (1.56%-2.36%)        | 13 (5-32)      | N1  | 305 (4,309)    | 7.08% (6.31%-7.84%)          | 8 (2-18)        |
|                  | T3  | 527 (6,832)    | 7.71% (7.08%-8.35%)        | 9 (3-23)       | N2  | 270 (2,784)    | 9.70% (8.60%-10.80%)         | 7 (1-15)        |
|                  | T4  | 125 (949)      | 13.17% (11.02%-15.32%)     | 9 (2-23)       | N3  | 0 (0)          | NA                           | NA              |
|                  | Unk | 305 (2,108)    | 14.47% (12.97%-15.97%)     | 4 (1-12)       | Unk | 178 (2,112)    | 8.43% (7.24%-9.61%)          | 5 (1-17)        |
|                  | T1  | 93 (11,413)    | 0.81% (0.65%-0.98%)<br>*** | 10 (3-20) ***  | N0  | 227 (14,600)   | 1.55% (1.35%-1.76%) ***      | 9 (3-20) *      |
|                  | T2  | 142 (4,530)    | 3.13% (2.63%-3.64%)        | 9 (3-25)       | N1  | 487 (5,254)    | 9.27% (8.48%-10.05%)         | 7 (3-16)        |
|                  | T3  | 333 (3,173)    | 10.49% (9.43%-11.56%)      | 7 (3-18)       | N2  | 0 (0)          | NA                           | NA              |
|                  | T4  | 110 (778)      | 14.14% (11.69%-16.59%)     | 7 (3-14)       | N3  | 0 (0)          | NA                           | NA              |
|                  | Unk | 166 (764)      | 21.73% (18.80%-24.65%)     | 4 (1-12)       | Unk | 130 (804)      | 16.17% (13.62%-18.71%)       | 5 (1-17)        |
|                  | T1  | 49 (5,596)     | 0.88% (0.63%-1.12%)<br>*** | 6 (2-42) ***   | N0  | 114 (7,185)    | 1.59% (1.30%-1.88%) ***      | 14 (2-54) ***   |
|                  | T2  | 35 (1,455)     | 2.41% (1.62%-3.19%)        | 8 (2-32)       | N1  | 110 (1,557)    | 7.06% (5.79%-8.34%)          | 6 (1-18)        |
|                  | T3  | 138 (2,073)    | 6.66% (5.58%-7.73%)        | 11 (2-47)      | N2  | 58 (614)       | 9.45% (7.13%-11.76%)         | 2 (1-8)         |
|                  | T4  | 36 (221)       | 16.29% (11.42%-21.16%)     | 3 (1-9)        | N3  | 10 (93)        | 10.75% (4.46%-17.05%)        | 3 (2-11)        |
|                  | Unk | 199 (1,169)    | 17.02% (14.87%-19.18%)     | 3 (0-13)       | Unk | 165 (1,065)    | 15.49% (13.32%-17.67%)       | 3 (1-15)        |
| Bone             | T1  | 94 (2,058)     | 4.57% (3.67%-5.47%)<br>*** | 30 (9-NA) ***  | N0  | 459 (4,472)    | 10.26% (9.37%-11.15%)<br>*** | 20 (9-NA) ns    |
|                  | T2  | 337 (1,983)    | 16.99% (15.34%-18.65%)     | 21 (9-NA)      | N1  | 84 (167)       | 50.30% (42.72%-57.88%)       | 15 (7-42)       |
|                  | T3  | 44 (126)       | 34.92% (26.60%-43.24%)     | 13 (7-35)      | N2  | 0 (0)          | NA                           | NA              |
|                  | T4  | NA ()          | #VALUE!                    | NA             | N3  | 0 (0)          | NA                           | NA              |
|                  | Unk | 134 (912)      | 14.69% (12.40%-16.99%)     | 12 (4-36)      | Unk | 66 (440)       | 15.00% (11.66%-18.34%)       | 18 (4-48)       |
|                  | T1  | 265 (5,651)    | 4.69% (4.14%-5.24%)<br>*** | 14 (5-32) ***  | N0  | 1,280 (16,937) | 7.56% (7.16%-7.96%) ***      | 11 (3-25) ***   |
|                  | T2  | 1,013 (10,654) | 9.51% (8.95%-10.07%)       | 11 (3-27)      | N1  | 313 (1,080)    | 28.98% (26.28%-31.69%)       | 6 (2-20)        |
|                  | T3  | 64 (300)       | 21.33% (16.70%-25.97%)     | 7 (2-14)       | N2  | 0 (5)          | NA                           | NA              |
|                  | T4  | 46 (156)       | 29.49% (22.33%-36.64%)     | 4 (1-14)       | N3  | 0 (0)          | NA                           | NA              |
|                  | Unk | 793 (8,332)    | 9.52% (8.89%-10.15%)       | 5 (1-17)       | Unk | 588 (7,071)    | 8.32% (7.67%-8.96%)          | 5 (1-19)        |
|                  | T1  | 63 (70,613)    | 0.09% (0.07%-0.11%)<br>*** | 11 (4-26) ***  | N0  | 362 (95,447)   | 0.38% (0.34%-0.42%) ***      | 8 (3-29) ***    |
|                  | T2  | 57 (15,179)    | 0.38% (0.28%-0.47%)        | 11 (5-21)      | N1  | 195 (4,665)    | 4.18% (3.61%-4.75%)          | 6 (2-18)        |
|                  | T3  | 88 (8,862)     | 0.99% (0.79%-1.20%)        | 13 (6-48)      | N2  | 61 (2,219)     | 2.75% (2.07%-3.43%)          | 11 (4-33)       |
|                  | T4  | 211 (6,773)    | 3.12% (2.70%-3.53%)        | 7 (3-24)       | N3  | 95 (1,266)     | 7.50% (6.05%-8.96%)          | 7 (2-19)        |
|                  | Unk | 646 (5,860)    | 11.02% (10.22%-11.83%)     | 4 (2-14)       | Unk | 352 (3,690)    | 9.54% (8.59%-10.49%)         | 4 (2-12)        |
|                  | T1  | 5 (601)        | 0.83% (0.11%-1.56%)<br>*** | 27 (10-27) ns  | N0  | 18 (2,187)     | 0.82% (0.44%-1.20%) ***      | 10 (5-NA) ***   |
|                  | T2  | 1 (467)        | NA                         | NA (NA-NA)     | N1  | 11 (124)       | 8.87% (3.87%-13.88%)         | 10 (4-27)       |
|                  | T3  | 4 (629)        | NA                         | 6 (4-10.5)     | N2  | 0 (31)         | NA                           | NA              |
|                  | T4  | 11 (473)       | 2.33% (0.97%-3.68%)        | 7 (1-NA)       | N3  | 1 (21)         | NA                           | 1 (1-1)         |
|                  | Unk | 85 (914)       | 9.30% (7.42%-11.18%)       | 5 (3-12)       | Unk | 76 (721)       | 10.54% (8.30%-12.78%)        | 5 (3-9)         |
| Skin cancer      | T1  | 5 (2,125)      | 0.24% (0.03%-0.44%)<br>*** | 16.5 (6-26) ns | N0  | 15 (4,118)     | 0.36% (0.18%-0.55%) ***      | 11 (6-25) ns    |
|                  | T2  | 11 (1,080)     | 1.02% (0.42%-1.62%)        | 10 (7-12)      | N1  | 8 (729)        | 1.10% (0.34%-1.85%)          | 8 (7-18)        |
|                  | T3  | 2 (200)        | NA                         | 5 (3-7)        | N2  | 6 (111)        | 5.41% (1.20%-9.61%)          | 10 (8-17)       |
|                  | T4  | 7 (119)        | 5.88% (1.65%-10.11%)       | 17 (8-18)      | N3  | 0 (3)          | NA                           | NA              |
| Embryonal tumors | Unk | 12 (1,821)     | 0.66% (0.29%-1.03%)        | 9 (5-20)       | Unk | 8 (384)        | 2.08% (0.65%-3.51%)          | 5 (4-34)        |
|                  | T1  | 2 (287)        | NA***                      | 9.5 (5-NA) *   | N0  | 12 (677)       | 1.77% (0.78%-2.77%) ***      | 11.5 (6-NA) *** |
|                  | T2  | 13 (413)       | 3.15% (1.46%-4.83%)        | 13 (9-57)      | N1  | 12 (195)       | 6.15% (2.78%-9.53%)          | 14 (7-20)       |
|                  | T3  | 0 (68)         | NA                         | NA             | N2  | 0 (1)          | NA                           | NA              |
|                  | T4  | 0 (28)         | NA                         | NA             | N3  | 0 (0)          | NA                           | NA              |

|           |     |                |                            |               |     |                |                         |              |
|-----------|-----|----------------|----------------------------|---------------|-----|----------------|-------------------------|--------------|
| All other | Unk | 319 (3,485)    | 9.15% (8.20%-10.11%)       | NA (23-NA)    | Unk | 310 (3,408)    | 9.10% (8.13%-10.06%)    | NA (33-NA)   |
|           | T1  | 175 (5,715)    | 3.06% (2.62%-3.51%)<br>*** | 15 (4-NA) *** | N0  | 655 (16,693)   | 3.92% (3.63%-4.22%) *** | 9 (2-23) *** |
|           | T2  | 245 (4,476)    | 5.47% (4.81%-6.14%)        | 9 (2-23)      | N1  | 378 (2,579)    | 14.66% (13.29%-16.02%)  | 6 (1-20)     |
|           | T3  | 431 (6,823)    | 6.32% (5.74%-6.89%)        | 10 (2-29)     | N2  | 165 (1,404)    | 11.75% (10.07%-13.44%)  | 4 (1-13)     |
|           | T4  | 308 (2,616)    | 11.77% (10.54%-13.01%)     | 4 (1-12)      | N3  | 27 (141)       | 19.15% (12.65%-25.64%)  | 3 (1-8)      |
|           | Unk | 1,744 (13,438) | 12.98% (12.41%-13.55%)     | 3 (0-16)      | Unk | 1,678 (12,251) | 13.70% (13.09%-14.31%)  | 3 (0-20)     |

<sup>a</sup>Prevalence was only calculated in category with more than 5 sLM cases.

<sup>b</sup>Survival data (in months) are shown as the median survival and interquartile range in cases with synchronous lung metastasis at diagnosis.

<sup>c</sup>Liver cancer here includes hepatocellular carcinoma and intrahepatic cholangiocarcinoma.

Abbreviations: sLM: synchronous lung metastasis; Unk: unknown; GI: gastrointestinal cancer; GU: genitourinary cancer; GYN: gynecologic cancer; STS: soft-tissue sarcoma; NA: non-applicable; ns: non-significant; \*: p<0.05; \*\*\*: p<0.001% for intragroup survival comparison by Chi-square tests or log-rank tests.

**Supplementary Table S5.** Number of cases with synchronous lung metastasis and all cases, prevalence of synchronous lung metastasis and median survival with interquartile range by cancer type and insurance status or marital status.

| Categories                 | Insurance | No. of sLM (All) | Prevalence <sup>a</sup>              | Survival <sup>b</sup>    | Marriage  | No. of sLM (All) | Prevalence <sup>a</sup>               | Survival <sup>b</sup>    |
|----------------------------|-----------|------------------|--------------------------------------|--------------------------|-----------|------------------|---------------------------------------|--------------------------|
| Brain                      | Insured   | 16 (26,006)      | 0.06% (0.03%-0.09%) <sup>ns</sup>    | 8 (2.5-23) <sup>ns</sup> | Married   | 6 (14,987)       | 0.04% (0.01%-0.07%) <sup>ns</sup>     | 8 (4-11) <sup>ns</sup>   |
|                            | Uninsured | 1 (1,028)        | NA                                   | 16 (16-16)               | Unmarried | 10 (11,351)      | 0.09% (0.03%-0.14%)                   | 9.5 (2-32)               |
|                            | Unk       | 0 (451)          | NA                                   | NA                       | Unk       | 1 (1,147)        | NA                                    | NA (NA-NA)               |
| Head and neck              | Insured   | 1,436 (69,299)   | 2.07% (1.97%-2.18%) <sup>***</sup>   | 9 (3-22) <sup>ns</sup>   | Married   | 628 (38,285)     | 1.64% (1.51%-1.77%) <sup>***</sup>    | 10 (4-24) <sup>***</sup> |
|                            | Uninsured | 107 (3,087)      | 3.47% (2.82%-4.11%)                  | 7 (2-15)                 | Unmarried | 864 (30,943)     | 2.79% (2.61%-2.98%)                   | 8 (3-18)                 |
|                            | Unk       | 31 (2,511)       | 1.23% (0.80%-1.67%)                  | 7 (4-17)                 | Unk       | 82 (5,669)       | 1.45% (1.14%-1.76%)                   | 8 (3-21)                 |
| Thyroid                    | Insured   | 947 (74,183)     | 1.28% (1.20%-1.36%) <sup>ns</sup>    | 11 (2-79) <sup>ns</sup>  | Married   | 509 (46,261)     | 1.10% (1.01%-1.20%) <sup>***</sup>    | 10 (2-70) <sup>ns</sup>  |
|                            | Uninsured | 34 (2,016)       | 1.69% (1.12%-2.25%)                  | 25 (3-NA)                | Unmarried | 450 (26,865)     | 1.68% (1.52%-1.83%)                   | 11 (2-NA)                |
|                            | Unk       | 15 (1,804)       | 0.83% (0.41%-1.25%)                  | 2 (0.5-NA)               | Unk       | 37 (4,877)       | 0.76% (0.52%-1.00%)                   | 20 (5-NA)                |
| Breast                     | Insured   | 5,515 (345,324)  | 1.60% (1.56%-1.64%) <sup>***</sup>   | 20 (5-48) <sup>***</sup> | Married   | 2,329 (196,295)  | 1.19% (1.14%-1.23%) <sup>***</sup>    | 26 (8-58) <sup>***</sup> |
|                            | Uninsured | 321 (6,149)      | 5.22% (4.66%-5.78%)                  | 14 (2-40)                | Unmarried | 3,310 (142,801)  | 2.32% (2.24%-2.40%)                   | 16 (3-41)                |
|                            | Unk       | 136 (7,176)      | 1.90% (1.58%-2.21%)                  | 22 (4-50)                | Unk       | 333 (19,553)     | 1.70% (1.52%-1.88%)                   | 24 (5-52)                |
| Main bronchus              | Insured   | 1,744 (10,230)   | 17.05% (16.32%-17.78%) <sup>ns</sup> | 4 (1-10) <sup>ns</sup>   | Married   | 876 (5,128)      | 17.08% (16.05%-18.11%) <sup>ns</sup>  | 4 (1-12) <sup>***</sup>  |
|                            | Uninsured | 85 (491)         | 17.31% (13.96%-20.66%)               | 2 (1-8)                  | Unmarried | 901 (5,337)      | 16.88% (15.88%-17.89%)                | 3 (1-9)                  |
|                            | Unk       | 24 (157)         | 15.29% (9.66%-20.92%)                | 2 (0-8)                  | Unk       | 76 (413)         | 18.40% (14.66%-22.14%)                | 3 (1-9)                  |
| Oesophagus                 | Insured   | 1,838 (18,911)   | 9.72% (9.30%-10.14%) <sup>***</sup>  | 4 (1-10) <sup>ns</sup>   | Married   | 986 (10,720)     | 9.20% (8.65%-9.74%) <sup>***</sup>    | 5 (1-11) <sup>***</sup>  |
|                            | Uninsured | 93 (687)         | 13.54% (10.98%-16.10%)               | 3 (1-6)                  | Unmarried | 898 (8,235)      | 10.90% (10.23%-11.58%)                | 3 (1-8)                  |
|                            | Unk       | 45 (470)         | 9.57% (6.91%-12.23%)                 | 3 (0.5-8)                | Unk       | 92 (1,113)       | 8.27% (6.65%-9.88%)                   | 5 (1-12)                 |
| Stomach                    | Insured   | 1,619 (29,790)   | 5.43% (5.18%-5.69%) <sup>***</sup>   | 3 (1-9) <sup>ns</sup>    | Married   | 978 (17,582)     | 5.56% (5.22%-5.90%) <sup>***</sup>    | 4 (1-10) <sup>***</sup>  |
|                            | Uninsured | 101 (1,248)      | 8.09% (6.58%-9.61%)                  | 3 (1-8)                  | Unmarried | 715 (12,469)     | 5.73% (5.33%-6.14%)                   | 3 (1-8)                  |
|                            | Unk       | 36 (787)         | 4.57% (3.11%-6.03%)                  | 2 (1-14)                 | Unk       | 63 (1,774)       | 3.55% (2.69%-4.41%)                   | 3 (1-11)                 |
| Liver <sup>c</sup>         | Insured   | 2,083 (24,796)   | 8.40% (8.06%-8.75%) <sup>***</sup>   | 2 (1-6) <sup>*</sup>     | Married   | 1,160 (13,739)   | 8.44% (7.98%-8.91%) <sup>*</sup>      | 3 (1-7) <sup>***</sup>   |
|                            | Uninsured | 119 (948)        | 12.55% (10.44%-14.66%)               | 1 (0-4)                  | Unmarried | 997 (11,212)     | 8.89% (8.37%-9.42%)                   | 2 (0-5)                  |
|                            | Unk       | 43 (523)         | 8.22% (5.87%-10.58%)                 | 3 (1-7)                  | Unk       | 88 (1,316)       | 6.69% (5.34%-8.04%)                   | 3 (1-10)                 |
| Extrahepatic biliary tract | Insured   | 817 (13,568)     | 6.02% (5.62%-6.42%) <sup>***</sup>   | 3 (1-8) <sup>ns</sup>    | Married   | 435 (7,541)      | 5.77% (5.24%-6.29%) <sup>ns</sup>     | 4 (1-9) <sup>*</sup>     |
|                            | Uninsured | 36 (458)         | 7.86% (5.40%-10.32%)                 | 2 (0.5-7)                | Unmarried | 405 (6,068)      | 6.67% (6.05%-7.30%)                   | 2 (1-7)                  |
|                            | Unk       | 23 (212)         | 10.85% (6.66%-15.04%)                | 2 (1-6)                  | Unk       | 36 (629)         | 5.72% (3.91%-7.54%)                   | 3 (1-9)                  |
| Pancreas                   | Insured   | 5,398 (50,109)   | 10.77% (10.50%-11.04%) <sup>ns</sup> | 3 (1-8) <sup>ns</sup>    | Married   | 3,043 (29,231)   | 10.41% (10.06%-10.76%) <sup>***</sup> | 3 (1-9) <sup>***</sup>   |
|                            | Uninsured | 183 (1,523)      | 12.02% (10.38%-13.65%)               | 2 (1-5)                  | Unmarried | 2,385 (20,874)   | 11.43% (10.99%-11.86%)                | 2 (1-6)                  |
|                            | Unk       | 101 (810)        | 12.47% (10.19%-14.74%)               | 2 (0-6)                  | Unk       | 254 (2,337)      | 10.87% (9.61%-12.13%)                 | 2 (1-6)                  |
| Small intestine            | Insured   | 225 (9,141)      | 2.46% (2.14%-2.78%) <sup>ns</sup>    | 8 (2-22) <sup>*</sup>    | Married   | 118 (5,507)      | 2.14% (1.76%-2.53%) <sup>*</sup>      | 11 (4-35) <sup>***</sup> |
|                            | Uninsured | 9 (247)          | 3.64% (1.31%-5.98%)                  | 4 (2-8)                  | Unmarried | 104 (3,530)      | 2.95% (2.39%-3.50%)                   | 6 (1-14)                 |
|                            | Unk       | 5 (240)          | 2.08% (0.28%-3.89%)                  | 2 (1-2)                  | Unk       | 17 (591)         | 2.88% (1.53%-4.22%)                   | 4 (1-8)                  |
| Colon & rectum             | Insured   | 8,918 (175,294)  | 5.09% (4.98%-5.19%) <sup>***</sup>   | 11 (3-25) <sup>ns</sup>  | Married   | 4,546 (96,321)   | 4.72% (4.59%-4.85%) <sup>***</sup>    | 14 (4-28) <sup>***</sup> |
|                            | Uninsured | 547 (6,268)      | 8.73% (8.03%-9.43%)                  | 11 (3-25)                | Unmarried | 4,564 (78,491)   | 5.81% (5.65%-5.98%)                   | 9 (2-23)                 |
|                            | Unk       | 180 (4,977)      | 3.62% (3.10%-4.14%)                  | 10 (1-28)                | Unk       | 535 (11,727)     | 4.56% (4.18%-4.94%)                   | 9 (2-26)                 |
| Right colon                | Insured   | 2,600 (69,097)   | 3.76% (3.62%-3.90%) <sup>***</sup>   | 8 (2-21) <sup>*</sup>    | Married   | 1,331 (36,427)   | 3.65% (3.46%-3.85%) <sup>*</sup>      | 10 (3-22) <sup>***</sup> |
|                            | Uninsured | 127 (1,927)      | 6.59% (5.48%-7.70%)                  | 9 (2-20)                 | Unmarried | 1,285 (32,074)   | 4.01% (3.79%-4.22%)                   | 6 (2-19)                 |
|                            | Unk       | 50 (1,359)       | 3.68% (2.68%-4.68%)                  | 2 (0.5-11)               | Unk       | 161 (3,882)      | 4.15% (3.52%-4.77%)                   | 9 (2-21)                 |

|                   |           |                 |                                       |                           |           |                |                                     |                          |
|-------------------|-----------|-----------------|---------------------------------------|---------------------------|-----------|----------------|-------------------------------------|--------------------------|
| Left colon        | Insured   | 3,112 (59,815)  | 5.20% (5.02%-5.38%) <sup>***</sup>    | 14 (4-28) <sup>ns</sup>   | Married   | 1,663 (33,713) | 4.93% (4.70%-5.16%) <sup>***</sup>  | 15 (5-31) <sup>***</sup> |
|                   | Uninsured | 208 (2,470)     | 8.42% (7.33%-9.52%)                   | 11 (3-26)                 | Unmarried | 1,521 (26,194) | 5.81% (5.52%-6.09%)                 | 12 (3-24)                |
|                   | Unk       | 50 (1,729)      | 2.89% (2.10%-3.68%)                   | 16 (3-32)                 | Unk       | 186 (4,107)    | 4.53% (3.89%-5.16%)                 | 8 (2-24)                 |
| Unspecified colon | Insured   | 676 (4,294)     | 15.74% (14.65%-16.83%) <sup>***</sup> | 3 (1-12) <sup>ns</sup>    | Married   | 306 (2,108)    | 14.52% (13.01%-16.02%) <sup>*</sup> | 4 (1-15) <sup>***</sup>  |
|                   | Uninsured | 46 (212)        | 21.70% (16.15%-27.25%)                | 4 (1-10)                  | Unmarried | 395 (2,279)    | 17.33% (15.78%-18.89%)              | 3 (1-10)                 |
|                   | Unk       | 24 (221)        | 10.86% (6.76%-14.96%)                 | 3 (1-14)                  | Unk       | 45 (340)       | 13.24% (9.63%-16.84%)               | 4 (0.5-15)               |
| Rectum            | Insured   | 2,530 (42,088)  | 6.01% (5.78%-6.24%) <sup>***</sup>    | 15 (5-30) <sup>ns</sup>   | Married   | 1,246 (24,073) | 5.18% (4.90%-5.46%) <sup>***</sup>  | 18 (7-33) <sup>***</sup> |
|                   | Uninsured | 166 (1,659)     | 10.01% (8.56%-11.45%)                 | 14 (5-27)                 | Unmarried | 1,363 (17,944) | 7.60% (7.21%-7.98%)                 | 13 (4-26)                |
|                   | Unk       | 56 (1,668)      | 3.36% (2.49%-4.22%)                   | 20 (4-32)                 | Unk       | 143 (3,398)    | 4.21% (3.53%-4.88%)                 | 16 (4-37)                |
| Anus              | Insured   | 170 (8,789)     | 1.93% (1.65%-2.22%) <sup>ns</sup>     | 11 (5-22) <sup>ns</sup>   | Married   | 62 (3,693)     | 1.68% (1.26%-2.09%) <sup>ns</sup>   | 14 (7-24) <sup>ns</sup>  |
|                   | Uninsured | 9 (370)         | 2.43% (0.86%-4.00%)                   | 46 (5-46)                 | Unmarried | 107 (5,118)    | 2.09% (1.70%-2.48%)                 | 10 (5-17)                |
|                   | Unk       | 4 (246)         | NA                                    | 12 (1-12)                 | Unk       | 14 (594)       | 2.36% (1.14%-3.58%)                 | 6 (5-17)                 |
| Other GI          | Insured   | 648 (8,045)     | 8.05% (7.46%-8.65%) <sup>ns</sup>     | 2 (0-7) <sup>ns</sup>     | Married   | 328 (4,440)    | 7.39% (6.62%-8.16%) <sup>ns</sup>   | 2 (0-9) <sup>***</sup>   |
|                   | Uninsured | 21 (336)        | 6.25% (3.66%-8.84%)                   | 2 (1-5)                   | Unmarried | 319 (3,737)    | 8.54% (7.64%-9.43%)                 | 1 (0-4)                  |
|                   | Unk       | 11 (230)        | 4.78% (2.02%-7.54%)                   | 2 (1-5)                   | Unk       | 33 (434)       | 7.60% (5.11%-10.10%)                | 2 (1-5)                  |
| Kidney            | Insured   | 5,506 (66,325)  | 8.30% (8.09%-8.51%) <sup>***</sup>    | 8 (2-22) <sup>ns</sup>    | Married   | 3,409 (41,424) | 8.23% (7.96%-8.49%) <sup>***</sup>  | 8 (3-25) <sup>***</sup>  |
|                   | Uninsured | 252 (2,039)     | 12.36% (10.93%-13.79%)                | 7 (2-19)                  | Unmarried | 2,196 (24,399) | 9.00% (8.64%-9.36%)                 | 6 (2-18)                 |
|                   | Unk       | 65 (1,241)      | 5.24% (4.00%-6.48%)                   | 6 (2-23)                  | Unk       | 218 (3,782)    | 5.76% (5.02%-6.51%)                 | 11 (2-26)                |
| Bladder           | Insured   | 1,167 (39,448)  | 2.96% (2.79%-3.13%) <sup>***</sup>    | 4 (1-11) <sup>ns</sup>    | Married   | 575 (23,066)   | 2.49% (2.29%-2.69%) <sup>***</sup>  | 5 (2-12) <sup>***</sup>  |
|                   | Uninsured | 31 (860)        | 3.60% (2.36%-4.85%)                   | 4 (1-10)                  | Unmarried | 593 (15,914)   | 3.73% (3.43%-4.02%)                 | 3 (1-9)                  |
|                   | Unk       | 17 (1,360)      | 1.25% (0.66%-1.84%)                   | 2 (1-4)                   | Unk       | 47 (2,688)     | 1.75% (1.25%-2.24%)                 | 2 (1-9)                  |
| Prostate          | Insured   | 1,244 (271,303) | 0.46% (0.43%-0.48%) <sup>***</sup>    | 22 (8-63) <sup>ns</sup>   | Married   | 736 (194,927)  | 0.38% (0.35%-0.40%) <sup>***</sup>  | 22 (8-63) <sup>ns</sup>  |
|                   | Uninsured | 62 (4,571)      | 1.36% (1.02%-1.69%)                   | 26 (9-NA)                 | Unmarried | 525 (68,084)   | 0.77% (0.71%-0.84%)                 | 23 (9-67)                |
|                   | Unk       | 33 (34,044)     | 0.10% (0.06%-0.13%)                   | 21 (4-NA)                 | Unk       | 78 (46,907)    | 0.17% (0.13%-0.20%)                 | 18 (10-48)               |
| Testis            | Insured   | 1,002 (13,977)  | 7.17% (6.74%-7.60%) <sup>***</sup>    | NA (24-NA) <sup>***</sup> | Married   | 267 (6,217)    | 4.29% (3.79%-4.80%) <sup>***</sup>  | NA (19-NA) <sup>ns</sup> |
|                   | Uninsured | 117 (1,245)     | 9.40% (7.78%-11.02%)                  | NA (10-NA)                | Unmarried | 829 (8,589)    | 9.65% (9.03%-10.28%)                | NA (21-NA)               |
|                   | Unk       | 10 (659)        | 1.52% (0.58%-2.45%)                   | NA (NA-NA)                | Unk       | 33 (1,075)     | 3.07% (2.04%-4.10%)                 | NA (NA-NA)               |
| Other GU          | Insured   | 508 (8,194)     | 6.20% (5.68%-6.72%) <sup>ns</sup>     | 5 (2-12) <sup>ns</sup>    | Married   | 286 (4,796)    | 5.96% (5.29%-6.63%) <sup>*</sup>    | 6 (2-13) <sup>***</sup>  |
|                   | Uninsured | 6 (232)         | 2.59% (0.54%-4.63%)                   | 3 (1-6)                   | Unmarried | 220 (3,321)    | 6.62% (5.78%-7.47%)                 | 4 (2-10)                 |
|                   | Unk       | 15 (292)        | 5.14% (2.60%-7.67%)                   | 7 (2-13)                  | Unk       | 23 (601)       | 3.83% (2.29%-5.36%)                 | 10 (2-15)                |
| Ovary             | Insured   | 1,604 (28,263)  | 5.68% (5.41%-5.95%) <sup>ns</sup>     | 16 (3-36) <sup>ns</sup>   | Married   | 768 (14,485)   | 5.30% (4.94%-5.67%) <sup>***</sup>  | 21 (4-45) <sup>***</sup> |
|                   | Uninsured | 67 (1,067)      | 6.28% (4.82%-7.73%)                   | 13 (1-27)                 | Unmarried | 863 (13,959)   | 6.18% (5.78%-6.58%)                 | 10 (2-32)                |
|                   | Unk       | 25 (459)        | 5.45% (3.37%-7.52%)                   | 8 (2-23)                  | Unk       | 65 (1,345)     | 4.83% (3.69%-5.98%)                 | 7 (2-23)                 |
| Cervix            | Insured   | 1,141 (69,824)  | 1.63% (1.54%-1.73%) <sup>***</sup>    | 8 (2-22) <sup>ns</sup>    | Married   | 512 (37,005)   | 1.38% (1.26%-1.50%) <sup>***</sup>  | 9 (2-25) <sup>ns</sup>   |
|                   | Uninsured | 67 (2,167)      | 3.09% (2.36%-3.82%)                   | 7 (1-26)                  | Unmarried | 663 (32,111)   | 2.06% (1.91%-2.22%)                 | 7 (2-20)                 |
|                   | Unk       | 24 (1,351)      | 1.78% (1.07%-2.48%)                   | 3 (1-7)                   | Unk       | 57 (4,226)     | 1.35% (1.00%-1.70%)                 | 6 (1-20)                 |
| Uterus            | Insured   | 765 (18,755)    | 4.08% (3.80%-4.36%) <sup>ns</sup>     | 7 (3-17) <sup>ns</sup>    | Married   | 287 (8,434)    | 3.40% (3.02%-3.79%) <sup>***</sup>  | 9 (3-20) <sup>ns</sup>   |
|                   | Uninsured | 60 (1,310)      | 4.58% (3.45%-5.71%)                   | 5 (1-11)                  | Unmarried | 516 (10,928)   | 4.72% (4.32%-5.12%)                 | 6 (2-15)                 |
|                   | Unk       | 19 (593)        | 3.20% (1.79%-4.62%)                   | 19 (3-39)                 | Unk       | 41 (1,296)     | 3.16% (2.21%-4.12%)                 | 8 (3-19)                 |
| Other GYN         | Insured   | 428 (9,884)     | 4.33% (3.93%-4.73%) <sup>*</sup>      | 5 (1-23) <sup>ns</sup>    | Married   | 184 (4,337)    | 4.24% (3.64%-4.84%) <sup>ns</sup>   | 7 (1-35) <sup>*</sup>    |
|                   | Uninsured | 20 (290)        | 6.90% (3.98%-9.81%)                   | 2 (0-11)                  | Unmarried | 251 (5,436)    | 4.62% (4.06%-5.18%)                 | 4 (1-16)                 |
|                   | Unk       | 9 (340)         | 2.65% (0.94%-4.35%)                   | 1 (0.5-7)                 | Unk       | 22 (741)       | 2.97% (1.75%-4.19%)                 | 2 (0-14)                 |
| Bone tumor        | Insured   | 582 (4,793)     | 12.14% (11.22%-13.07%) <sup>*</sup>   | 19 (8-NA) <sup>***</sup>  | Married   | 167 (1,775)    | 9.41% (8.05%-10.77%) <sup>***</sup> | 9 (3-25) <sup>***</sup>  |

|                   |           |                |                                    |                          |           |                |                                    |                           |
|-------------------|-----------|----------------|------------------------------------|--------------------------|-----------|----------------|------------------------------------|---------------------------|
| STS               | Uninsured | 23 (178)       | 12.92% (7.99%-17.85%)              | 10 (3-NA)                | Unmarried | 423 (3,081)    | 13.73% (12.51%-14.94%)             | 25 (10-NA)                |
|                   | Unk       | 4 (108)        | NA                                 | 4 (2-11)                 | Unk       | 19 (223)       | 8.52% (4.86%-12.18%)               | 16 (6-38)                 |
|                   | Insured   | 2,049 (22,964) | 8.92% (8.55%-9.29%) <sup>***</sup> | 8 (2-23) <sup>ns</sup>   | Married   | 1,002 (12,283) | 8.16% (7.67%-8.64%) <sup>***</sup> | 9 (2-24) <sup>ns</sup>    |
| Skin melanoma     | Uninsured | 103 (933)      | 11.04% (9.03%-13.05%)              | 9 (2-22)                 | Unmarried | 1,095 (10,738) | 10.20% (9.63%-10.77%)              | 8 (2-23)                  |
|                   | Unk       | 29 (1,196)     | 2.42% (1.55%-3.30%)                | 4 (1-28)                 | Unk       | 84 (2,072)     | 4.05% (3.20%-4.90%)                | 5 (1-16)                  |
|                   | Insured   | 985 (80,810)   | 1.22% (1.14%-1.29%) <sup>***</sup> | 6 (2-20) <sup>ns</sup>   | Married   | 541 (52,158)   | 1.04% (0.95%-1.12%) <sup>***</sup> | 7 (2-23) <sup>***</sup>   |
| Non-skin melanoma | Uninsured | 44 (1,676)     | 2.63% (1.86%-3.39%)                | 4 (1-12)                 | Unmarried | 472 (24,950)   | 1.89% (1.72%-2.06%)                | 5 (2-16)                  |
|                   | Unk       | 36 (24,801)    | 0.15% (0.10%-0.19%)                | 7 (1-25)                 | Unk       | 52 (30,179)    | 0.17% (0.13%-0.22%) <sup>ns</sup>  | 10 (4-31)                 |
|                   | Insured   | 95 (2,901)     | 3.27% (2.63%-3.92%) <sup>*</sup>   | 6 (3-14) <sup>ns</sup>   | Married   | 54 (1,662)     | 3.25% (2.40%-4.10%) <sup>ns</sup>  | 6 (3-10) <sup>ns</sup>    |
| Skin cancer       | Uninsured | 8 (89)         | 8.99% (3.05%-14.93%)               | 5.5 (4.5-6.5)            | Unmarried | 46 (1,150)     | 4.00% (2.87%-5.13%)                | 6 (3-18)                  |
|                   | Unk       | 3 (94)         | NA                                 | 8 (6-16)                 | Unk       | 6 (272)        | 2.21% (0.46%-3.95%)                | 5.5 (3-6)                 |
|                   | Insured   | 32 (4,540)     | 0.70% (0.46%-0.95%) <sup>ns</sup>  | 9 (5-17) <sup>ns</sup>   | Married   | 17 (2,664)     | 0.64% (0.34%-0.94%) <sup>ns</sup>  | 9 (5-11) <sup>ns</sup>    |
| Embryonal tumors  | Uninsured | 1 (65)         | NA                                 | NA (NA-NA)               | Unmarried | 17 (1,648)     | 1.03% (0.54%-1.52%)                | 17 (7-34)                 |
|                   | Unk       | 4 (740)        | NA                                 | 35 (7-NA)                | Unk       | 3 (1,033)      | NA                                 | 14 (8-20)                 |
|                   | Insured   | 325 (4,096)    | 7.93% (7.11%-8.76%) <sup>ns</sup>  | NA (20-NA) <sup>ns</sup> | Married   | 12 (357)       | 3.36% (1.49%-5.23%) <sup>***</sup> | 6 (3.5-16) <sup>***</sup> |
| All other         | Uninsured | 3 (88)         | NA                                 | 12 (2-NA)                | Unmarried | 322 (3,876)    | 8.31% (7.44%-9.18%)                | NA (26-NA)                |
|                   | Unk       | 6 (97)         | 6.19% (1.39%-10.98%)               | NA (NA-NA)               | Unk       | 0 (48)         | NA                                 | NA                        |
|                   | Insured   | 2,694 (30,805) | 8.75% (8.43%-9.06%) <sup>***</sup> | 5 (1-20) <sup>*</sup>    | Married   | 1,320 (16,211) | 8.14% (7.72%-8.56%) <sup>***</sup> | 6 (1-23) <sup>***</sup>   |
|                   | Uninsured | 133 (1,202)    | 11.06% (9.29%-12.84%)              | 2 (0-13)                 | Unmarried | 1,443 (15,004) | 9.62% (9.15%-10.09%)               | 4 (1-18)                  |
|                   | Unk       | 76 (1,061)     | 7.16% (5.61%-8.71%)                | 2 (0-14)                 | Unk       | 140 (1,853)    | 7.56% (6.35%-8.76%)                | 5 (1-14)                  |

<sup>a</sup>Prevalence was only calculated in category with more than 5 sLM cases.

<sup>b</sup>Survival data (in months) are shown as the median survival and interquartile range in cases with synchronous lung metastasis at diagnosis.

<sup>c</sup>Liver cancer here includes hepatocellular carcinoma and intrahepatic cholangiocarcinoma.

Abbreviations: sLM: synchronous lung metastasis; Unk: unknown; GI: gastrointestinal cancer; GU: genitourinary cancer; GYN: gynecologic cancer; STS: soft-tissue sarcoma; NA: non-applicable; ns: non-significant; \*: p<0.05; \*\*\*: p<0.001% for intragroup survival comparison by Chi-square tests or log-rank tests.
